# Supplementary material
Source: publisher site journal article supplement (https://www.dovepress.com/get_supplementary_file.php?f=488082.xlsx)
Supplement: Supplementary file 1 [file get_supplementary_file.php]

## Sheet: Supplement 1
,SNP,chr.outcome,pos.outcome,other_allele.outcome,effect_allele.outcome,beta.outcome,se.outcome,pval.outcome,eaf.outcome,samplesize.outcome,ncase.outcome,ncontrol.outcome,mr_keep.outcome,pval_origin.outcome,id.outcome
1,rs10100547,8,123853184,A,G,-0.00010902,0.000179006,0.540000299,0.482843,462933,3292,459641,TRUE,reported,zxSz2N
2,rs10225041,7,32489610,T,C,-2.48E-05,0.000180149,0.889999986,0.378437,462933,3292,459641,TRUE,reported,zxSz2N
3,rs10443218,1,40370795,T,C,6.71E-05,0.000179089,0.70999943,0.390717,462933,3292,459641,TRUE,reported,zxSz2N
4,rs10499198,6,138266431,C,T,-0.000283387,0.000187272,0.129999895,0.324076,462933,3292,459641,TRUE,reported,zxSz2N
5,rs10809441,9,11366549,C,T,-0.000215189,0.000175931,0.220000162,0.449079,462933,3292,459641,TRUE,reported,zxSz2N
6,rs10810848,9,17759497,T,C,-0.000223389,0.000222034,0.310000219,0.193399,462933,3292,459641,TRUE,reported,zxSz2N
7,rs10897304,11,62690247,A,G,-2.49E-05,0.000186492,0.889999986,0.328459,462933,3292,459641,TRUE,reported,zxSz2N
8,rs10902641,17,934156,G,A,9.66E-05,0.000224305,0.670000304,0.795199,462933,3292,459641,TRUE,reported,zxSz2N
9,rs10942927,5,71524163,A,T,0.000105111,0.000181559,0.559999965,0.367495,462933,3292,459641,TRUE,reported,zxSz2N
10,rs11136574,8,2939862,T,A,-0.000470808,0.000207658,0.023000115,0.238521,462933,3292,459641,TRUE,reported,zxSz2N
11,rs11196940,10,116593791,T,G,6.26E-05,0.000174913,0.719999177,0.495198,462933,3292,459641,TRUE,reported,zxSz2N
12,rs11213961,11,97961093,C,T,-0.000137803,0.000191957,0.470000154,0.299456,462933,3292,459641,TRUE,reported,zxSz2N
13,rs1125313,18,52859261,A,C,5.54E-05,0.000175371,0.749999545,0.499867,462933,3292,459641,TRUE,reported,zxSz2N
14,rs12034885,1,73651519,A,T,-3.33E-05,0.000174908,0.84999995,0.49715,462933,3292,459641,TRUE,reported,zxSz2N
15,rs12189782,6,102985313,T,A,0.000218704,0.000284228,0.440000328,0.106963,462933,3292,459641,TRUE,reported,zxSz2N
16,rs12473198,2,63428742,A,G,-0.000241781,0.000175189,0.170000031,0.491207,462933,3292,459641,TRUE,reported,zxSz2N
17,rs12487736,3,47459679,C,T,-0.00028696,0.000176587,0.1,0.574571,462933,3292,459641,TRUE,reported,zxSz2N
18,rs12507345,4,165585563,A,G,1.39E-06,0.000174595,0.98999999,0.509235,462933,3292,459641,TRUE,reported,zxSz2N
19,rs12596936,16,52392483,C,T,-0.000152375,0.000187514,0.419999719,0.320277,462933,3292,459641,TRUE,reported,zxSz2N
20,rs12914876,15,49438415,C,T,-4.93E-05,0.000215261,0.82000009,0.214392,462933,3292,459641,TRUE,reported,zxSz2N
21,rs12995836,2,51772064,C,T,4.84E-05,0.000179079,0.789999834,0.403011,462933,3292,459641,TRUE,reported,zxSz2N
22,rs13026974,2,226783922,A,C,-8.89E-05,0.000240821,0.70999943,0.156745,462933,3292,459641,TRUE,reported,zxSz2N
23,rs13071208,3,71201759,T,C,-0.000309098,0.000181395,0.087999459,0.380349,462933,3292,459641,TRUE,reported,zxSz2N
24,rs13082658,3,39376084,A,G,8.98E-05,0.000189561,0.640000038,0.308506,462933,3292,459641,TRUE,reported,zxSz2N
25,rs13148506,4,43123482,C,T,6.18E-05,0.000183172,0.740000478,0.349808,462933,3292,459641,TRUE,reported,zxSz2N
26,rs13233747,7,73149302,G,A,2.18E-05,0.000183964,0.910000016,0.348484,462933,3292,459641,TRUE,reported,zxSz2N
27,rs1430674,2,195925970,A,G,-8.00E-05,0.000245458,0.740000478,0.851012,462933,3292,459641,TRUE,reported,zxSz2N
28,rs143502921,20,59827231,G,C,-5.21E-05,0.000254762,0.840000027,0.179506,462933,3292,459641,TRUE,reported,zxSz2N
29,rs1441104,2,104535716,G,A,-0.000132879,0.000174995,0.450000504,0.492396,462933,3292,459641,TRUE,reported,zxSz2N
30,rs1512406,8,139299165,C,T,-0.000398689,0.000183778,0.029999913,0.637522,462933,3292,459641,TRUE,reported,zxSz2N
31,rs17815942,2,191813539,A,G,9.04E-05,0.000178407,0.610000232,0.605185,462933,3292,459641,TRUE,reported,zxSz2N
32,rs1799632,12,55125787,A,G,-0.000222093,0.000176528,0.209999857,0.425229,462933,3292,459641,TRUE,reported,zxSz2N
33,rs1975886,10,14078220,T,C,-2.87E-05,0.000203681,0.889999986,0.754024,462933,3292,459641,TRUE,reported,zxSz2N
34,rs1993766,16,82873870,T,C,-0.000198697,0.000187955,0.290000001,0.319807,462933,3292,459641,TRUE,reported,zxSz2N
35,rs2054064,8,14905579,A,T,-2.92E-05,0.000251488,0.910000016,0.143524,462933,3292,459641,TRUE,reported,zxSz2N
36,rs2151397,13,66363467,T,A,0.000227984,0.000202037,0.259999792,0.25199,462933,3292,459641,TRUE,reported,zxSz2N
37,rs2309981,9,74172702,A,T,-0.000374123,0.000265508,0.160000006,0.87535,462933,3292,459641,TRUE,reported,zxSz2N
38,rs2369818,16,21614009,C,T,0.000113285,0.000175956,0.519999589,0.439713,462933,3292,459641,TRUE,reported,zxSz2N
39,rs2499839,1,161960782,A,G,-0.000169719,0.000185527,0.359999585,0.668323,462933,3292,459641,TRUE,reported,zxSz2N
40,rs2551972,2,208536856,G,A,-7.56E-05,0.00017542,0.670000304,0.475955,462933,3292,459641,TRUE,reported,zxSz2N
41,rs28693900,15,38856493,A,G,-0.000193362,0.000175176,0.270000147,0.518346,462933,3292,459641,TRUE,reported,zxSz2N
42,rs2944484,10,133004661,G,A,-5.56E-05,0.000180391,0.760000713,0.615868,462933,3292,459641,TRUE,reported,zxSz2N
43,rs2979188,8,8335730,C,G,0.000447813,0.00022266,0.043999729,0.191813,462933,3292,459641,TRUE,reported,zxSz2N
44,rs34341354,5,15678556,G,A,-9.04E-05,0.000179255,0.610000232,0.399311,462933,3292,459641,TRUE,reported,zxSz2N
45,rs34846217,18,38843951,G,A,7.49E-05,0.000202373,0.70999943,0.287157,462933,3292,459641,TRUE,reported,zxSz2N
46,rs35301711,6,83231332,C,T,-4.77E-05,0.000232974,0.840000027,0.170675,462933,3292,459641,TRUE,reported,zxSz2N
47,rs35340239,13,68980988,C,T,0.000290777,0.000281792,0.299999824,0.114691,462933,3292,459641,TRUE,reported,zxSz2N
48,rs361457,7,142143562,C,A,0.000198791,0.000179759,0.270000147,0.3938,462933,3292,459641,TRUE,reported,zxSz2N
49,rs3746522,20,44680412,C,T,0.000230658,0.000216663,0.290000001,0.215898,462933,3292,459641,TRUE,reported,zxSz2N
50,rs3807866,7,12250378,G,A,0.000468005,0.000177374,0.008300036,0.410759,462933,3292,459641,TRUE,reported,zxSz2N
51,rs4131943,11,339969,G,A,0.000119228,0.000266695,0.649999466,0.877207,462933,3292,459641,TRUE,reported,zxSz2N
52,rs4405712,2,153997672,A,G,0.000298831,0.000199659,0.129999895,0.2673,462933,3292,459641,TRUE,reported,zxSz2N
53,rs442282,12,68786416,C,A,-0.000104703,0.000203157,0.610000232,0.247252,462933,3292,459641,TRUE,reported,zxSz2N
54,rs4434089,22,23383863,G,A,-0.000188045,0.000191842,0.330000046,0.293972,462933,3292,459641,TRUE,reported,zxSz2N
55,rs471296,11,123105243,C,G,-0.000102594,0.000216497,0.640000038,0.791287,462933,3292,459641,TRUE,reported,zxSz2N
56,rs4722028,7,21462121,A,G,-0.000487187,0.000181669,0.007299952,0.630534,462933,3292,459641,TRUE,reported,zxSz2N
57,rs4736824,8,41879961,C,T,0.000200712,0.000175752,0.249999995,0.551344,462933,3292,459641,TRUE,reported,zxSz2N
58,rs4798766,18,9086213,G,A,-3.19E-05,0.000182984,0.860000097,0.642322,462933,3292,459641,TRUE,reported,zxSz2N
59,rs4904623,14,42067186,T,C,0.000256998,0.000208546,0.220000162,0.771534,462933,3292,459641,TRUE,reported,zxSz2N
60,rs5030956,6,27213969,G,C,0.000201519,0.00020214,0.320000016,0.248245,462933,3292,459641,TRUE,reported,zxSz2N
61,rs55994309,11,80265430,C,T,-0.000118125,0.00019478,0.540000299,0.283634,462933,3292,459641,TRUE,reported,zxSz2N
62,rs56871666,18,50226797,A,G,9.10E-05,0.000283699,0.749999545,0.107327,462933,3292,459641,TRUE,reported,zxSz2N
63,rs58457416,5,141084505,G,A,0.000430007,0.000254743,0.090999708,0.140221,462933,3292,459641,TRUE,reported,zxSz2N
64,rs58473710,1,191203760,T,C,0.000307118,0.000190426,0.11000008,0.306294,462933,3292,459641,TRUE,reported,zxSz2N
65,rs6087542,20,32512044,C,T,7.00E-05,0.000188957,0.70999943,0.688244,462933,3292,459641,TRUE,reported,zxSz2N
66,rs61836184,10,14455205,T,G,1.46E-05,0.000243481,0.949999988,0.162586,462933,3292,459641,TRUE,reported,zxSz2N
67,rs62031270,16,27996822,C,T,3.54E-05,0.000195644,0.860000097,0.285493,462933,3292,459641,TRUE,reported,zxSz2N
68,rs62188172,2,176506054,T,C,-0.000292027,0.000236537,0.220000162,0.163686,462933,3292,459641,TRUE,reported,zxSz2N
69,rs62466272,7,101227377,C,A,0.000134572,0.000236106,0.570000189,0.166577,462933,3292,459641,TRUE,reported,zxSz2N
70,rs627882,7,4205960,T,C,4.69E-05,0.000219389,0.830000015,0.197213,462933,3292,459641,TRUE,reported,zxSz2N
71,rs6452969,5,91064360,A,G,4.02E-05,0.00018244,0.830000015,0.359756,462933,3292,459641,TRUE,reported,zxSz2N
72,rs6489589,12,5100437,C,T,-0.000137042,0.000205011,0.499999995,0.759523,462933,3292,459641,TRUE,reported,zxSz2N
73,rs6851651,4,142402636,C,G,-8.73E-05,0.000190891,0.649999466,0.696811,462933,3292,459641,TRUE,reported,zxSz2N
74,rs7016314,8,14043662,T,C,-7.40E-05,0.000184519,0.689999856,0.655948,462933,3292,459641,TRUE,reported,zxSz2N
75,rs7045289,9,129913558,A,G,-0.000266573,0.000194194,0.170000031,0.283887,462933,3292,459641,TRUE,reported,zxSz2N
76,rs7186155,16,72178196,A,G,-4.55E-05,0.000175861,0.800000024,0.553543,462933,3292,459641,TRUE,reported,zxSz2N
77,rs7188873,16,24727064,A,G,0.000227258,0.000180391,0.209999857,0.622798,462933,3292,459641,TRUE,reported,zxSz2N
78,rs73801216,5,166853784,G,A,7.01E-05,0.000243268,0.770000487,0.169842,462933,3292,459641,TRUE,reported,zxSz2N
79,rs7424130,2,16249563,A,C,0.000373798,0.000201128,0.06299992,0.252242,462933,3292,459641,TRUE,reported,zxSz2N
80,rs7514305,1,210797443,G,T,5.29E-05,0.000182736,0.770000487,0.631049,462933,3292,459641,TRUE,reported,zxSz2N
81,rs752973,2,144633596,G,A,0.00021528,0.000192598,0.259999792,0.289889,462933,3292,459641,TRUE,reported,zxSz2N
82,rs792359,3,173010202,T,G,6.45E-05,0.000228746,0.780000714,0.177169,462933,3292,459641,TRUE,reported,zxSz2N
83,rs79769442,1,8658477,C,T,9.96E-05,0.000220871,0.649999466,0.194799,462933,3292,459641,TRUE,reported,zxSz2N
84,rs8111479,19,54478545,G,A,-0.000104677,0.000218513,0.630000654,0.799572,462933,3292,459641,TRUE,reported,zxSz2N
85,rs849054,6,6533706,T,C,-0.0001332,0.000178456,0.460000178,0.420999,462933,3292,459641,TRUE,reported,zxSz2N
86,rs853676,6,28299687,C,T,-0.000317024,0.000236133,0.180000205,0.163359,462933,3292,459641,TRUE,reported,zxSz2N
87,rs9398376,6,97712712,C,T,-0.000292386,0.000220809,0.190000175,0.194638,462933,3292,459641,TRUE,reported,zxSz2N
88,rs9828050,3,20040282,A,G,-0.000187361,0.000216905,0.390000353,0.203361,462933,3292,459641,TRUE,reported,zxSz2N

## Sheet: Supplement 2
chr.exposure,pos.exposure,other_allele.exposure,effect_allele.exposure,beta.exposure,se.exposure,pval.exposure,eaf.exposure,samplesize.exposure,ncase.exposure,SNP,ncontrol.exposure,mr_keep.exposure,pval_origin.exposure,id.exposure
1,14721450,G,A,0.000818635,0.000189678,1.60E-05,0.321782,462933,3292,rs3932686,459641,TRUE,reported,C8snoN
1,14731583,C,T,0.000784421,0.000183253,1.90E-05,0.348406,462933,3292,rs1328830,459641,TRUE,reported,C8snoN
1,14732363,G,T,0.000782053,0.000186587,2.80E-05,0.33061,462933,3292,rs7513739,459641,TRUE,reported,C8snoN
1,44898004,G,A,0.000924599,0.000227625,4.90E-05,0.192143,462933,3292,rs1987309,459641,TRUE,reported,C8snoN
1,58197487,T,A,0.00101568,0.000219556,3.70E-06,0.282422,462933,3292,rs3118032,459641,TRUE,reported,C8snoN
1,102236342,G,A,0.000732644,0.000180349,4.90E-05,0.387321,462933,3292,rs7513765,459641,TRUE,reported,C8snoN
1,102239205,G,A,0.000734525,0.000180418,4.70E-05,0.387234,462933,3292,rs1470438,459641,TRUE,reported,C8snoN
1,152658661,G,T,-0.00077317,0.000189934,4.70E-05,0.304826,462933,3292,rs11581281,459641,TRUE,reported,C8snoN
1,152682350,A,C,-0.000767029,0.000183208,2.80E-05,0.353952,462933,3292,rs4353097,459641,TRUE,reported,C8snoN
1,152682693,T,C,-0.00076418,0.000183178,3.00E-05,0.354234,462933,3292,rs12728274,459641,TRUE,reported,C8snoN
1,152685025,C,T,-0.000756233,0.000183166,3.60E-05,0.353348,462933,3292,rs12754243,459641,TRUE,reported,C8snoN
1,152689901,A,C,-0.000760355,0.000182654,3.10E-05,0.356041,462933,3292,rs11205086,459641,TRUE,reported,C8snoN
1,152701156,G,A,-0.000767701,0.000182795,2.70E-05,0.353621,462933,3292,rs55683499,459641,TRUE,reported,C8snoN
1,152701395,A,G,-0.000755897,0.000182528,3.50E-05,0.356005,462933,3292,rs10788847,459641,TRUE,reported,C8snoN
1,152708298,C,A,-0.000772992,0.000183029,2.40E-05,0.353034,462933,3292,rs61812714,459641,TRUE,reported,C8snoN
1,152709456,G,T,-0.000775247,0.000183201,2.30E-05,0.352952,462933,3292,rs4845473,459641,TRUE,reported,C8snoN
1,152709548,G,A,-0.000772662,0.000183243,2.50E-05,0.352888,462933,3292,rs4845474,459641,TRUE,reported,C8snoN
1,152710165,G,T,-0.000743924,0.000179397,3.40E-05,0.398341,462933,3292,rs11588950,459641,TRUE,reported,C8snoN
1,152726908,T,C,-0.000744971,0.000178713,3.10E-05,0.396246,462933,3292,rs35393920,459641,TRUE,reported,C8snoN
1,152727768,C,T,-0.000739933,0.000178706,3.50E-05,0.396231,462933,3292,rs56180022,459641,TRUE,reported,C8snoN
1,152728472,A,C,-0.000740289,0.000178697,3.40E-05,0.396248,462933,3292,rs11578927,459641,TRUE,reported,C8snoN
1,152734187,G,A,-0.00073016,0.000177982,4.10E-05,0.406384,462933,3292,rs11581045,459641,TRUE,reported,C8snoN
1,152734796,G,A,-0.000730963,0.000177993,4.00E-05,0.406423,462933,3292,rs1591077,459641,TRUE,reported,C8snoN
1,152735171,T,G,-0.000743244,0.000178796,3.20E-05,0.396074,462933,3292,rs12725760,459641,TRUE,reported,C8snoN
1,152735687,G,A,-0.000754506,0.000178684,2.40E-05,0.396492,462933,3292,rs35274012,459641,TRUE,reported,C8snoN
1,152736291,C,T,-0.000749166,0.000178677,2.80E-05,0.396495,462933,3292,rs4539140,459641,TRUE,reported,C8snoN
1,152739226,C,T,-0.000746982,0.000178725,2.90E-05,0.396552,462933,3292,rs10494277,459641,TRUE,reported,C8snoN
1,152746417,C,T,-0.000751823,0.000178541,2.50E-05,0.398924,462933,3292,rs34384421,459641,TRUE,reported,C8snoN
1,152746534,T,C,-0.000745002,0.000178728,3.10E-05,0.396562,462933,3292,rs4845482,459641,TRUE,reported,C8snoN
1,152748253,G,A,-0.000746636,0.00017876,3.00E-05,0.396562,462933,3292,rs12239774,459641,TRUE,reported,C8snoN
1,152750506,T,C,-0.000752974,0.000178708,2.50E-05,0.397014,462933,3292,rs1888964,459641,TRUE,reported,C8snoN
1,152751595,G,C,-0.000755245,0.000178691,2.40E-05,0.39728,462933,3292,rs10157301,459641,TRUE,reported,C8snoN
1,152753798,T,C,-0.000744236,0.000178761,3.10E-05,0.396539,462933,3292,rs2339381,459641,TRUE,reported,C8snoN
1,152754039,C,T,-0.0007527,0.000178712,2.50E-05,0.397008,462933,3292,rs2879458,459641,TRUE,reported,C8snoN
1,152754630,G,A,-0.000743718,0.000178758,3.20E-05,0.396522,462933,3292,rs11586156,459641,TRUE,reported,C8snoN
1,152755956,T,A,-0.000743272,0.00017876,3.20E-05,0.396512,462933,3292,rs36012879,459641,TRUE,reported,C8snoN
1,152756423,G,A,-0.000743513,0.000178782,3.20E-05,0.396532,462933,3292,rs11587180,459641,TRUE,reported,C8snoN
1,247606739,G,A,-0.000760635,0.000179469,2.30E-05,0.422455,462933,3292,rs4925661,459641,TRUE,reported,C8snoN
2,33120410,A,T,0.000736667,0.000179801,4.20E-05,0.572504,462933,3292,rs6723737,459641,TRUE,reported,C8snoN
2,67046565,T,G,0.000751719,0.000177988,2.40E-05,0.577504,462933,3292,rs10865358,459641,TRUE,reported,C8snoN
2,69529531,C,T,-0.00104401,0.000233898,8.10E-06,0.167765,462933,3292,rs12620315,459641,TRUE,reported,C8snoN
2,69533492,A,G,-0.00101199,0.000234445,1.60E-05,0.16692,462933,3292,rs60680381,459641,TRUE,reported,C8snoN
2,69546480,G,A,-0.0010243,0.000234201,1.20E-05,0.167621,462933,3292,rs56250322,459641,TRUE,reported,C8snoN
2,69548495,T,G,-0.00101968,0.000234246,1.30E-05,0.167574,462933,3292,rs67016706,459641,TRUE,reported,C8snoN
2,69553658,A,C,-0.0010552,0.000237997,9.30E-06,0.162485,462933,3292,rs67218758,459641,TRUE,reported,C8snoN
2,69555902,G,A,-0.00101578,0.000234262,1.50E-05,0.167505,462933,3292,rs55962715,459641,TRUE,reported,C8snoN
2,69556144,A,C,-0.00101518,0.000234265,1.50E-05,0.167493,462933,3292,rs55885494,459641,TRUE,reported,C8snoN
2,69558112,C,T,-0.00101463,0.000234257,1.50E-05,0.167496,462933,3292,rs12473304,459641,TRUE,reported,C8snoN
2,69560024,A,G,-0.00103108,0.000227478,5.80E-06,0.180449,462933,3292,rs12466648,459641,TRUE,reported,C8snoN
2,69564580,A,G,-0.00100579,0.000234288,1.80E-05,0.167382,462933,3292,rs72826571,459641,TRUE,reported,C8snoN
2,69574658,G,A,-0.00100709,0.000234105,1.70E-05,0.167487,462933,3292,rs7599338,459641,TRUE,reported,C8snoN
2,69580970,C,T,-0.00100824,0.000234165,1.70E-05,0.167415,462933,3292,rs66931274,459641,TRUE,reported,C8snoN
2,69584616,C,A,-0.00100827,0.000234164,1.70E-05,0.167417,462933,3292,rs67560216,459641,TRUE,reported,C8snoN
2,69589883,C,T,-0.00100418,0.000234244,1.80E-05,0.167324,462933,3292,rs113952888,459641,TRUE,reported,C8snoN
2,69599024,A,C,-0.00100245,0.000234167,1.90E-05,0.167425,462933,3292,rs67052036,459641,TRUE,reported,C8snoN
2,69615794,G,C,-0.00106124,0.000235306,6.50E-06,0.165355,462933,3292,rs67340771,459641,TRUE,reported,C8snoN
2,69618072,G,T,-0.00106009,0.000235321,6.60E-06,0.16533,462933,3292,rs6708008,459641,TRUE,reported,C8snoN
2,69619288,G,A,-0.00106034,0.000235312,6.60E-06,0.165341,462933,3292,rs7563719,459641,TRUE,reported,C8snoN
2,69620650,G,C,-0.00106032,0.000235312,6.60E-06,0.16534,462933,3292,rs56175187,459641,TRUE,reported,C8snoN
2,69623932,C,T,-0.00105757,0.000235351,7.00E-06,0.165278,462933,3292,rs6729268,459641,TRUE,reported,C8snoN
2,69628089,A,T,-0.00106048,0.000235298,6.60E-06,0.165343,462933,3292,rs12464941,459641,TRUE,reported,C8snoN
2,69628491,T,G,-0.00106102,0.000235301,6.50E-06,0.165407,462933,3292,rs12477398,459641,TRUE,reported,C8snoN
2,69629807,G,A,-0.00106296,0.00023527,6.20E-06,0.165412,462933,3292,rs55851539,459641,TRUE,reported,C8snoN
2,69631483,G,T,-0.00106056,0.000235298,6.60E-06,0.165344,462933,3292,rs112913113,459641,TRUE,reported,C8snoN
2,69631579,G,A,-0.0010182,0.000228792,8.60E-06,0.179113,462933,3292,rs111506194,459641,TRUE,reported,C8snoN
2,69632620,T,C,-0.00106113,0.000235294,6.50E-06,0.165373,462933,3292,rs6759021,459641,TRUE,reported,C8snoN
2,69638700,T,G,-0.00106163,0.000235269,6.40E-06,0.165373,462933,3292,rs12466680,459641,TRUE,reported,C8snoN
2,69640145,G,A,-0.00106741,0.000233999,5.10E-06,0.167793,462933,3292,rs7602427,459641,TRUE,reported,C8snoN
2,69640722,C,A,-0.00106515,0.000233994,5.30E-06,0.16779,462933,3292,rs12612489,459641,TRUE,reported,C8snoN
2,69642615,G,A,-0.0010679,0.000233993,5.00E-06,0.167799,462933,3292,rs7557646,459641,TRUE,reported,C8snoN
2,69643848,T,G,-0.00105306,0.00023532,7.60E-06,0.165256,462933,3292,rs12618636,459641,TRUE,reported,C8snoN
2,69645422,C,T,-0.0010716,0.000234047,4.70E-06,0.167659,462933,3292,rs67938413,459641,TRUE,reported,C8snoN
2,69645760,G,A,-0.00107367,0.00023561,5.20E-06,0.164881,462933,3292,rs112020804,459641,TRUE,reported,C8snoN
2,69645828,C,T,-0.00110798,0.000235178,2.50E-06,0.166453,462933,3292,rs75137187,459641,TRUE,reported,C8snoN
2,69645848,A,G,-0.00110737,0.000235211,2.50E-06,0.166425,462933,3292,rs111794927,459641,TRUE,reported,C8snoN
2,69646236,G,A,-0.00107541,0.000233877,4.30E-06,0.167813,462933,3292,rs13388690,459641,TRUE,reported,C8snoN
2,69646504,G,A,-0.00107675,0.000233872,4.10E-06,0.167797,462933,3292,rs7605572,459641,TRUE,reported,C8snoN
2,69647277,A,G,-0.00107233,0.000228065,2.60E-06,0.178459,462933,3292,rs4131555,459641,TRUE,reported,C8snoN
2,69648829,G,A,-0.00108907,0.000226942,1.60E-06,0.180835,462933,3292,rs7560364,459641,TRUE,reported,C8snoN
2,69649968,C,A,-0.00107819,0.000228243,2.30E-06,0.1781,462933,3292,rs112076318,459641,TRUE,reported,C8snoN
2,69650445,T,A,-0.00108174,0.000228287,2.20E-06,0.177997,462933,3292,rs67662551,459641,TRUE,reported,C8snoN
2,69656354,T,C,-0.00108129,0.000228339,2.20E-06,0.177972,462933,3292,rs59129812,459641,TRUE,reported,C8snoN
2,69664921,A,T,-0.00102555,0.000228866,7.40E-06,0.177229,462933,3292,rs67347664,459641,TRUE,reported,C8snoN
2,69666423,A,C,-0.00101676,0.000234775,1.50E-05,0.166018,462933,3292,rs149316175,459641,TRUE,reported,C8snoN
2,69666626,C,G,-0.0010167,0.000234775,1.50E-05,0.166018,462933,3292,rs72833923,459641,TRUE,reported,C8snoN
2,69668004,C,A,-0.00102718,0.000235086,1.20E-05,0.165435,462933,3292,rs67481136,459641,TRUE,reported,C8snoN
2,69671683,A,C,-0.00101288,0.000234795,1.60E-05,0.165999,462933,3292,rs113394164,459641,TRUE,reported,C8snoN
2,69672871,A,G,-0.00101256,0.000233081,1.40E-05,0.169118,462933,3292,rs112826171,459641,TRUE,reported,C8snoN
2,69673898,T,C,-0.00101703,0.000234764,1.50E-05,0.166163,462933,3292,rs150923658,459641,TRUE,reported,C8snoN
2,69677296,T,G,-0.00103184,0.000233267,9.70E-06,0.168753,462933,3292,rs66641893,459641,TRUE,reported,C8snoN
2,69678853,T,C,-0.00100674,0.000234553,1.80E-05,0.166395,462933,3292,rs72833929,459641,TRUE,reported,C8snoN
2,69679197,G,A,-0.00103484,0.000234932,1.10E-05,0.165726,462933,3292,rs55932708,459641,TRUE,reported,C8snoN
2,69693747,T,C,-0.000940278,0.000226889,3.40E-05,0.181648,462933,3292,rs57171084,459641,TRUE,reported,C8snoN
2,69699104,T,A,-0.000959311,0.000227236,2.40E-05,0.181067,462933,3292,rs67711978,459641,TRUE,reported,C8snoN
2,69703791,G,C,-0.000960969,0.000227311,2.40E-05,0.181077,462933,3292,rs60773368,459641,TRUE,reported,C8snoN
2,69704614,G,A,-0.000957566,0.000227806,2.60E-05,0.180478,462933,3292,rs34711913,459641,TRUE,reported,C8snoN
2,69704941,A,G,-0.000973497,0.000226382,1.70E-05,0.18328,462933,3292,rs2312205,459641,TRUE,reported,C8snoN
2,69704970,G,T,-0.000956114,0.000226586,2.40E-05,0.182806,462933,3292,rs11688141,459641,TRUE,reported,C8snoN
2,69705286,C,T,-0.000963684,0.000227368,2.30E-05,0.180971,462933,3292,rs7582735,459641,TRUE,reported,C8snoN
2,69705886,G,A,-0.000960739,0.000227417,2.40E-05,0.180876,462933,3292,rs7583591,459641,TRUE,reported,C8snoN
2,69708367,T,C,-0.000947674,0.000226826,2.90E-05,0.182376,462933,3292,rs6546523,459641,TRUE,reported,C8snoN
2,69709079,A,T,-0.000951379,0.000227092,2.80E-05,0.181603,462933,3292,rs41285955,459641,TRUE,reported,C8snoN
2,69709919,A,G,-0.000959098,0.000227319,2.50E-05,0.181083,462933,3292,rs6721259,459641,TRUE,reported,C8snoN
2,69717385,T,C,-0.000961933,0.000228494,2.60E-05,0.178653,462933,3292,rs7569000,459641,TRUE,reported,C8snoN
2,69722616,T,C,-0.000987063,0.000231198,2.00E-05,0.172559,462933,3292,rs12476268,459641,TRUE,reported,C8snoN
2,69723710,C,T,-0.000998986,0.000229322,1.30E-05,0.175856,462933,3292,rs7577851,459641,TRUE,reported,C8snoN
2,69724649,C,G,-0.00101133,0.000229671,1.10E-05,0.1754,462933,3292,rs111258456,459641,TRUE,reported,C8snoN
2,69725982,G,C,-0.000993356,0.000231459,1.80E-05,0.172296,462933,3292,rs67325097,459641,TRUE,reported,C8snoN
2,69728852,C,T,-0.0010007,0.000231752,1.60E-05,0.172094,462933,3292,rs2871962,459641,TRUE,reported,C8snoN
2,69730942,C,T,-0.00100982,0.00023199,1.30E-05,0.171693,462933,3292,rs12475178,459641,TRUE,reported,C8snoN
2,69738790,T,C,-0.000980022,0.000229732,2.00E-05,0.176159,462933,3292,rs6760776,459641,TRUE,reported,C8snoN
2,69739714,C,T,-0.00100532,0.000232112,1.50E-05,0.171474,462933,3292,rs6749509,459641,TRUE,reported,C8snoN
2,69741801,C,T,-0.000995364,0.000232432,1.80E-05,0.17135,462933,3292,rs6757825,459641,TRUE,reported,C8snoN
2,69742989,C,A,-0.000998868,0.000232778,1.80E-05,0.171294,462933,3292,rs72837952,459641,TRUE,reported,C8snoN
2,125324765,A,G,0.000969056,0.000236165,4.10E-05,0.164851,462933,3292,rs17011693,459641,TRUE,reported,C8snoN
2,162798581,A,G,0.00072851,0.000176427,3.60E-05,0.435655,462933,3292,rs6717424,459641,TRUE,reported,C8snoN
2,162802993,G,T,0.000747824,0.000176026,2.20E-05,0.447699,462933,3292,rs12474587,459641,TRUE,reported,C8snoN
2,162805019,T,A,0.000726146,0.000176435,3.90E-05,0.435633,462933,3292,rs62189668,459641,TRUE,reported,C8snoN
2,162811186,A,G,0.000727771,0.00017645,3.70E-05,0.435612,462933,3292,rs4637136,459641,TRUE,reported,C8snoN
2,162816167,G,A,0.000725799,0.000176458,3.90E-05,0.435391,462933,3292,rs13011013,459641,TRUE,reported,C8snoN
2,162821515,G,A,0.000729836,0.000176439,3.50E-05,0.435368,462933,3292,rs4233647,459641,TRUE,reported,C8snoN
2,162822709,G,A,0.000753686,0.000175981,1.80E-05,0.4478,462933,3292,rs13021985,459641,TRUE,reported,C8snoN
2,162825174,C,T,0.00072914,0.000176424,3.60E-05,0.435455,462933,3292,rs12986853,459641,TRUE,reported,C8snoN
2,162831756,G,T,0.00073112,0.000176428,3.40E-05,0.43525,462933,3292,rs4295021,459641,TRUE,reported,C8snoN
2,162836272,A,G,-0.000743403,0.000176272,2.50E-05,0.563177,462933,3292,rs2909444,459641,TRUE,reported,C8snoN
2,162843078,T,C,-0.000740133,0.000176116,2.60E-05,0.563136,462933,3292,rs2909455,459641,TRUE,reported,C8snoN
2,162845565,T,C,-0.000738311,0.000176154,2.80E-05,0.56309,462933,3292,rs1861979,459641,TRUE,reported,C8snoN
2,162846439,G,A,-0.000739595,0.00017615,2.70E-05,0.563051,462933,3292,rs2909443,459641,TRUE,reported,C8snoN
2,162866255,C,T,-0.000720677,0.000176631,4.50E-05,0.555071,462933,3292,rs2909448,459641,TRUE,reported,C8snoN
2,162910223,G,C,0.000720469,0.000175889,4.20E-05,0.443815,462933,3292,rs6741949,459641,TRUE,reported,C8snoN
2,188953133,C,T,0.000961771,0.000230813,3.10E-05,0.178396,462933,3292,rs1371530,459641,TRUE,reported,C8snoN
2,218680591,A,G,0.000759756,0.000183773,3.60E-05,0.346564,462933,3292,rs41383244,459641,TRUE,reported,C8snoN
3,30704855,G,A,0.0011175,0.000252582,9.70E-06,0.143624,462933,3292,rs67573460,459641,TRUE,reported,C8snoN
3,46933960,C,G,-0.00072698,0.000176811,3.90E-05,0.579921,462933,3292,rs1001284,459641,TRUE,reported,C8snoN
3,55154380,G,C,0.00113007,0.000278385,4.90E-05,0.111295,462933,3292,rs62256237,459641,TRUE,reported,C8snoN
3,55161284,T,C,0.00108665,0.000264049,3.90E-05,0.125663,462933,3292,rs62256241,459641,TRUE,reported,C8snoN
3,55162189,C,G,0.00106992,0.000263075,4.80E-05,0.12657,462933,3292,rs62256242,459641,TRUE,reported,C8snoN
3,55165761,C,T,0.00117031,0.00027848,2.60E-05,0.111142,462933,3292,rs1841141,459641,TRUE,reported,C8snoN
3,55166092,G,A,0.00117725,0.000278432,2.40E-05,0.111199,462933,3292,rs1458980,459641,TRUE,reported,C8snoN
3,55176673,T,C,0.00109136,0.000250996,1.40E-05,0.141491,462933,3292,rs62254574,459641,TRUE,reported,C8snoN
3,78815906,G,A,-0.000786337,0.000190409,3.60E-05,0.305986,462933,3292,rs424737,459641,TRUE,reported,C8snoN
3,78824912,T,C,-0.000786935,0.000190268,3.50E-05,0.306243,462933,3292,rs333472,459641,TRUE,reported,C8snoN
3,78877109,G,A,-0.000788406,0.000183766,1.80E-05,0.351465,462933,3292,rs162869,459641,TRUE,reported,C8snoN
3,78880867,T,G,0.000796931,0.000194494,4.20E-05,0.715138,462933,3292,rs162818,459641,TRUE,reported,C8snoN
4,38925137,T,C,0.00074218,0.000177199,2.80E-05,0.419752,462933,3292,rs9995232,459641,TRUE,reported,C8snoN
4,39798698,C,A,0.000763875,0.00018545,3.80E-05,0.349059,462933,3292,rs62307864,459641,TRUE,reported,C8snoN
4,73781518,C,A,0.000776882,0.000189132,4.00E-05,0.691232,462933,3292,rs6814202,459641,TRUE,reported,C8snoN
4,73833891,G,A,-0.00097816,0.000238455,4.10E-05,0.166534,462933,3292,rs72661075,459641,TRUE,reported,C8snoN
4,111324679,G,A,-0.000755834,0.000185724,4.70E-05,0.670992,462933,3292,rs10017096,459641,TRUE,reported,C8snoN
4,140576200,T,C,0.00102762,0.000245239,2.80E-05,0.149468,462933,3292,rs1078764,459641,TRUE,reported,C8snoN
4,140579702,G,C,0.00104851,0.000244352,1.80E-05,0.150605,462933,3292,rs1874619,459641,TRUE,reported,C8snoN
4,140580748,G,A,0.00104745,0.000245016,1.90E-05,0.149464,462933,3292,rs12640152,459641,TRUE,reported,C8snoN
4,140581039,T,C,0.00104691,0.000245001,1.90E-05,0.149482,462933,3292,rs12650833,459641,TRUE,reported,C8snoN
4,140581261,G,A,0.00104272,0.000244342,2.00E-05,0.150574,462933,3292,rs12640917,459641,TRUE,reported,C8snoN
4,140581321,C,T,0.00104765,0.000245001,1.90E-05,0.149471,462933,3292,rs17050850,459641,TRUE,reported,C8snoN
4,140582374,A,G,0.00103396,0.00024499,2.40E-05,0.149458,462933,3292,rs66529843,459641,TRUE,reported,C8snoN
4,140582853,G,A,0.00103496,0.000244974,2.40E-05,0.149453,462933,3292,rs72728769,459641,TRUE,reported,C8snoN
4,140583991,C,A,0.00104095,0.000245027,2.20E-05,0.149355,462933,3292,rs59591198,459641,TRUE,reported,C8snoN
4,140584389,A,C,0.00104108,0.000244672,2.10E-05,0.149951,462933,3292,rs57804109,459641,TRUE,reported,C8snoN
4,140584885,A,G,0.00105018,0.000245112,1.80E-05,0.149049,462933,3292,rs28548995,459641,TRUE,reported,C8snoN
4,140585031,G,A,0.00104706,0.000245076,1.90E-05,0.149771,462933,3292,rs8191997,459641,TRUE,reported,C8snoN
5,6518618,C,T,0.000785409,0.000177412,9.60E-06,0.427545,462933,3292,rs487740,459641,TRUE,reported,C8snoN
5,6521659,G,C,0.000735162,0.000175597,2.80E-05,0.449773,462933,3292,rs565336,459641,TRUE,reported,C8snoN
5,6521891,C,T,0.000736684,0.000175754,2.80E-05,0.449355,462933,3292,rs580236,459641,TRUE,reported,C8snoN
5,6522221,C,T,0.000747025,0.000178031,2.70E-05,0.412528,462933,3292,rs538938,459641,TRUE,reported,C8snoN
5,6523807,C,T,0.000778483,0.000176113,9.90E-06,0.45569,462933,3292,rs529686,459641,TRUE,reported,C8snoN
5,67567053,G,C,-0.000728783,0.000178612,4.50E-05,0.395432,462933,3292,rs1819987,459641,TRUE,reported,C8snoN
5,67570962,C,T,-0.000739626,0.000178658,3.50E-05,0.395313,462933,3292,rs6890202,459641,TRUE,reported,C8snoN
5,67571270,C,T,-0.000742199,0.000178766,3.30E-05,0.394245,462933,3292,rs6894871,459641,TRUE,reported,C8snoN
5,67571413,T,C,-0.000731395,0.000177687,3.90E-05,0.410303,462933,3292,rs6876003,459641,TRUE,reported,C8snoN
5,67571868,T,G,-0.000740179,0.000178693,3.40E-05,0.39523,462933,3292,rs1010793,459641,TRUE,reported,C8snoN
5,67572893,G,A,-0.000750768,0.000178879,2.70E-05,0.393997,462933,3292,rs6861401,459641,TRUE,reported,C8snoN
5,106768342,C,A,-0.000850481,0.000207489,4.20E-05,0.230289,462933,3292,rs154646,459641,TRUE,reported,C8snoN
5,106770307,A,G,-0.000849469,0.000207442,4.20E-05,0.230265,462933,3292,rs152611,459641,TRUE,reported,C8snoN
5,106770638,T,C,-0.000848703,0.000207491,4.30E-05,0.23008,462933,3292,rs152609,459641,TRUE,reported,C8snoN
5,106771209,C,T,-0.000847507,0.000207483,4.40E-05,0.229988,462933,3292,rs152608,459641,TRUE,reported,C8snoN
5,106771514,A,C,-0.000842299,0.000207271,4.80E-05,0.230713,462933,3292,rs152607,459641,TRUE,reported,C8snoN
5,106772631,T,C,-0.000849479,0.000207371,4.20E-05,0.230206,462933,3292,rs152605,459641,TRUE,reported,C8snoN
5,106772918,T,G,-0.000859954,0.000207135,3.30E-05,0.231077,462933,3292,rs149498,459641,TRUE,reported,C8snoN
5,106774823,A,G,-0.000848508,0.0002072,4.20E-05,0.230817,462933,3292,rs151958,459641,TRUE,reported,C8snoN
5,106777432,G,A,-0.000857292,0.000207468,3.60E-05,0.229912,462933,3292,rs152601,459641,TRUE,reported,C8snoN
5,106779754,C,T,-0.00085752,0.00020738,3.50E-05,0.230023,462933,3292,rs152598,459641,TRUE,reported,C8snoN
5,106781232,C,T,-0.000859375,0.000207211,3.40E-05,0.230409,462933,3292,rs152596,459641,TRUE,reported,C8snoN
5,106781376,C,T,-0.000852234,0.000207243,3.90E-05,0.230372,462933,3292,rs152595,459641,TRUE,reported,C8snoN
5,106782106,T,G,-0.000849665,0.000207151,4.10E-05,0.230918,462933,3292,rs152593,459641,TRUE,reported,C8snoN
5,106782662,C,T,-0.000852367,0.000207282,3.90E-05,0.230395,462933,3292,rs152592,459641,TRUE,reported,C8snoN
5,106783294,G,A,-0.000856779,0.000207627,3.70E-05,0.22955,462933,3292,rs152591,459641,TRUE,reported,C8snoN
5,106786281,T,C,-0.000852193,0.000207332,4.00E-05,0.231174,462933,3292,rs152589,459641,TRUE,reported,C8snoN
5,106786616,C,T,-0.000848727,0.000207634,4.40E-05,0.230068,462933,3292,rs149444,459641,TRUE,reported,C8snoN
5,106790512,T,A,-0.000862005,0.000208028,3.40E-05,0.230025,462933,3292,rs115779,459641,TRUE,reported,C8snoN
5,106793799,T,C,-0.000874915,0.000207713,2.50E-05,0.232024,462933,3292,rs152582,459641,TRUE,reported,C8snoN
5,152798385,C,T,0.00100943,0.000228898,1.00E-05,0.182577,462933,3292,rs1478364,459641,TRUE,reported,C8snoN
5,172698790,G,T,-0.0010776,0.000255793,2.50E-05,0.1349,462933,3292,rs72818049,459641,TRUE,reported,C8snoN
5,172699760,C,T,-0.00107407,0.000256072,2.70E-05,0.135492,462933,3292,rs72818051,459641,TRUE,reported,C8snoN
5,172700938,A,G,-0.00106922,0.000233754,4.80E-06,0.173126,462933,3292,rs3132148,459641,TRUE,reported,C8snoN
5,172701170,A,G,-0.00105676,0.000233629,6.10E-06,0.173379,462933,3292,rs3132149,459641,TRUE,reported,C8snoN
6,63460527,A,G,0.00108681,0.000264307,3.90E-05,0.125105,462933,3292,rs9343126,459641,TRUE,reported,C8snoN
6,63460645,C,A,0.00108694,0.000264308,3.90E-05,0.125105,462933,3292,rs9360771,459641,TRUE,reported,C8snoN
6,63484734,T,C,0.00108708,0.000264199,3.90E-05,0.125161,462933,3292,rs6904023,459641,TRUE,reported,C8snoN
6,63487557,A,T,0.00108823,0.000264207,3.80E-05,0.125147,462933,3292,rs7750405,459641,TRUE,reported,C8snoN
6,63493511,A,T,0.00107624,0.000264396,4.70E-05,0.125033,462933,3292,rs9341488,459641,TRUE,reported,C8snoN
6,63529332,C,T,0.00107289,0.000264348,4.90E-05,0.125229,462933,3292,rs9352176,459641,TRUE,reported,C8snoN
6,161295154,C,T,0.000917243,0.000225546,4.80E-05,0.184444,462933,3292,rs2465841,459641,TRUE,reported,C8snoN
6,161295598,G,A,0.00091685,0.00022559,4.80E-05,0.184386,462933,3292,rs1937483,459641,TRUE,reported,C8snoN
6,161296541,T,C,0.000917139,0.000225525,4.80E-05,0.184457,462933,3292,rs2465842,459641,TRUE,reported,C8snoN
6,161296660,A,G,0.000916947,0.000225525,4.80E-05,0.184455,462933,3292,rs2465843,459641,TRUE,reported,C8snoN
6,161297724,G,A,0.000925671,0.00022548,4.00E-05,0.184504,462933,3292,rs2489945,459641,TRUE,reported,C8snoN
6,161298404,A,T,0.000931559,0.000225467,3.60E-05,0.184489,462933,3292,rs2465875,459641,TRUE,reported,C8snoN
6,161298592,G,T,0.000931668,0.00022547,3.60E-05,0.184482,462933,3292,rs2465874,459641,TRUE,reported,C8snoN
6,161300088,T,C,0.000929895,0.000225446,3.70E-05,0.184488,462933,3292,rs2465872,459641,TRUE,reported,C8snoN
6,161309174,G,C,0.000929017,0.000225535,3.80E-05,0.183957,462933,3292,rs9365229,459641,TRUE,reported,C8snoN
6,168248210,C,G,-0.000742737,0.000183066,5.00E-05,0.363057,462933,3292,rs9455911,459641,TRUE,reported,C8snoN
7,997334,C,G,-0.000881899,0.000197588,8.10E-06,0.270824,462933,3292,rs13242526,459641,TRUE,reported,C8snoN
7,1065569,C,T,-0.00076452,0.000185578,3.80E-05,0.334484,462933,3292,rs11974176,459641,TRUE,reported,C8snoN
7,2387095,G,A,0.000815994,0.000178776,5.00E-06,0.424853,462933,3292,rs73275098,459641,TRUE,reported,C8snoN
7,2390135,G,T,0.00076226,0.00017758,1.80E-05,0.412328,462933,3292,rs11767378,459641,TRUE,reported,C8snoN
7,2390174,C,T,0.000763348,0.00017762,1.70E-05,0.412663,462933,3292,rs11760846,459641,TRUE,reported,C8snoN
7,76028163,C,T,0.00087096,0.000212464,4.10E-05,0.214971,462933,3292,rs75640836,459641,TRUE,reported,C8snoN
7,76033544,T,C,0.000870074,0.000212422,4.20E-05,0.214927,462933,3292,rs11773646,459641,TRUE,reported,C8snoN
7,76033805,A,T,0.00087045,0.000212416,4.20E-05,0.214936,462933,3292,rs11773653,459641,TRUE,reported,C8snoN
7,88661480,C,G,-0.000756307,0.000174897,1.50E-05,0.525506,462933,3292,rs11981555,459641,TRUE,reported,C8snoN
7,88661654,G,C,-0.000746504,0.000174878,2.00E-05,0.524791,462933,3292,rs10952944,459641,TRUE,reported,C8snoN
7,88663728,C,T,-0.000736405,0.000174779,2.50E-05,0.516228,462933,3292,rs56343928,459641,TRUE,reported,C8snoN
7,88663933,G,A,-0.000733601,0.000174784,2.70E-05,0.51592,462933,3292,rs11773817,459641,TRUE,reported,C8snoN
7,88664180,A,G,-0.000749295,0.00017479,1.80E-05,0.516828,462933,3292,rs10952945,459641,TRUE,reported,C8snoN
7,88667405,A,G,-0.000731887,0.000174759,2.80E-05,0.517146,462933,3292,rs10808074,459641,TRUE,reported,C8snoN
7,88668270,A,C,-0.000753244,0.000174875,1.70E-05,0.522735,462933,3292,rs6968673,459641,TRUE,reported,C8snoN
7,88668366,C,T,-0.00071413,0.000174773,4.40E-05,0.515092,462933,3292,rs11767785,459641,TRUE,reported,C8snoN
7,88668577,G,A,-0.000721324,0.000174775,3.70E-05,0.515665,462933,3292,rs11767892,459641,TRUE,reported,C8snoN
7,88669315,G,A,-0.000727999,0.000174839,3.10E-05,0.520993,462933,3292,rs7806867,459641,TRUE,reported,C8snoN
7,88669461,C,A,-0.000732677,0.000174841,2.80E-05,0.520882,462933,3292,rs2888672,459641,TRUE,reported,C8snoN
7,88670694,G,A,-0.000754613,0.000174802,1.60E-05,0.522419,462933,3292,rs6942704,459641,TRUE,reported,C8snoN
7,88673166,C,T,-0.000763722,0.000174784,1.20E-05,0.524136,462933,3292,rs6957715,459641,TRUE,reported,C8snoN
7,88673612,C,A,-0.000755745,0.000174813,1.50E-05,0.523688,462933,3292,rs4571667,459641,TRUE,reported,C8snoN
7,88674566,G,C,-0.000770426,0.000174794,1.00E-05,0.525107,462933,3292,rs2078798,459641,TRUE,reported,C8snoN
7,88675738,T,C,-0.000770449,0.000174795,1.00E-05,0.525112,462933,3292,rs982526,459641,TRUE,reported,C8snoN
7,88676035,G,A,-0.000750837,0.000174793,1.70E-05,0.524055,462933,3292,rs11980967,459641,TRUE,reported,C8snoN
7,88676411,C,T,-0.000768933,0.000174795,1.10E-05,0.525038,462933,3292,rs12538305,459641,TRUE,reported,C8snoN
7,88678540,C,A,-0.000765669,0.000174807,1.20E-05,0.525168,462933,3292,rs1858816,459641,TRUE,reported,C8snoN
7,88678563,A,G,-0.000766311,0.000174805,1.20E-05,0.525228,462933,3292,rs1858817,459641,TRUE,reported,C8snoN
7,88679459,G,A,-0.000763025,0.000174833,1.30E-05,0.524792,462933,3292,rs7795086,459641,TRUE,reported,C8snoN
7,88679740,C,T,-0.000748722,0.000174867,1.90E-05,0.523609,462933,3292,rs7795297,459641,TRUE,reported,C8snoN
7,88683008,C,T,-0.000756026,0.000174786,1.50E-05,0.523946,462933,3292,rs7778567,459641,TRUE,reported,C8snoN
7,88683186,T,C,-0.000760513,0.000174782,1.40E-05,0.524283,462933,3292,rs2027978,459641,TRUE,reported,C8snoN
7,88685494,G,T,-0.000760357,0.000174777,1.40E-05,0.525142,462933,3292,rs2027973,459641,TRUE,reported,C8snoN
7,88685542,A,G,-0.000766886,0.000174786,1.10E-05,0.525232,462933,3292,rs2027974,459641,TRUE,reported,C8snoN
7,88686620,G,A,-0.000766404,0.000174854,1.20E-05,0.524403,462933,3292,rs2157802,459641,TRUE,reported,C8snoN
7,88687828,C,G,-0.00076949,0.000174895,1.10E-05,0.523832,462933,3292,rs10952946,459641,TRUE,reported,C8snoN
7,88695596,C,T,-0.000766053,0.000174925,1.20E-05,0.523954,462933,3292,rs13233091,459641,TRUE,reported,C8snoN
7,88701075,T,A,-0.000738407,0.000175355,2.50E-05,0.53208,462933,3292,rs11971164,459641,TRUE,reported,C8snoN
7,88702527,T,C,-0.000754172,0.000175372,1.70E-05,0.533499,462933,3292,rs34040982,459641,TRUE,reported,C8snoN
7,88704616,A,G,-0.000779837,0.000175055,8.40E-06,0.5237,462933,3292,rs10952947,459641,TRUE,reported,C8snoN
7,88704998,G,A,-0.000727294,0.000175038,3.30E-05,0.528216,462933,3292,rs2373836,459641,TRUE,reported,C8snoN
7,88705541,C,T,-0.000769871,0.000175089,1.10E-05,0.522788,462933,3292,rs2373837,459641,TRUE,reported,C8snoN
7,88706725,T,A,-0.000777287,0.000175082,9.00E-06,0.523554,462933,3292,rs11971081,459641,TRUE,reported,C8snoN
7,88707046,A,G,-0.000777022,0.000175083,9.10E-06,0.523545,462933,3292,rs11975088,459641,TRUE,reported,C8snoN
7,88707389,G,T,-0.000757903,0.000174974,1.50E-05,0.516713,462933,3292,rs13238453,459641,TRUE,reported,C8snoN
7,88709265,T,G,-0.000775104,0.000175089,9.60E-06,0.523368,462933,3292,rs11763222,459641,TRUE,reported,C8snoN
7,88717236,G,A,-0.000761177,0.000174985,1.40E-05,0.517423,462933,3292,rs6976179,459641,TRUE,reported,C8snoN
7,88719475,A,C,-0.00076552,0.000174972,1.20E-05,0.517881,462933,3292,rs1155132,459641,TRUE,reported,C8snoN
7,88719866,A,C,-0.0007688,0.000174979,1.10E-05,0.518478,462933,3292,rs6953374,459641,TRUE,reported,C8snoN
7,88719897,G,A,-0.000768903,0.000174978,1.10E-05,0.518482,462933,3292,rs6953942,459641,TRUE,reported,C8snoN
7,88720063,A,G,-0.000761036,0.000174972,1.40E-05,0.517547,462933,3292,rs6953704,459641,TRUE,reported,C8snoN
7,88720737,A,G,-0.000765582,0.000174973,1.20E-05,0.517892,462933,3292,rs1859115,459641,TRUE,reported,C8snoN
7,88721252,A,G,-0.000764398,0.000174982,1.30E-05,0.51768,462933,3292,rs4382404,459641,TRUE,reported,C8snoN
7,88722889,C,T,-0.000770065,0.000175242,1.10E-05,0.523019,462933,3292,rs2106940,459641,TRUE,reported,C8snoN
7,88723627,A,T,-0.000768325,0.000175097,1.10E-05,0.523483,462933,3292,rs11761319,459641,TRUE,reported,C8snoN
7,88723903,G,A,-0.000764438,0.000174982,1.30E-05,0.518768,462933,3292,rs12704428,459641,TRUE,reported,C8snoN
7,88724428,T,C,-0.000779741,0.000175096,8.50E-06,0.525061,462933,3292,rs6958093,459641,TRUE,reported,C8snoN
7,88724481,C,T,-0.00077948,0.000175097,8.50E-06,0.525053,462933,3292,rs6975869,459641,TRUE,reported,C8snoN
7,88725424,A,G,-0.00078355,0.000175105,7.70E-06,0.525342,462933,3292,rs11763136,459641,TRUE,reported,C8snoN
7,88725890,T,G,-0.000776655,0.000175118,9.20E-06,0.524762,462933,3292,rs13230038,459641,TRUE,reported,C8snoN
7,88726210,G,A,-0.000780948,0.000175129,8.20E-06,0.525157,462933,3292,rs4418271,459641,TRUE,reported,C8snoN
7,88727340,C,G,-0.000779982,0.000175112,8.40E-06,0.525035,462933,3292,rs1029438,459641,TRUE,reported,C8snoN
7,88729766,A,G,-0.000774778,0.000175172,9.70E-06,0.524466,462933,3292,rs12667028,459641,TRUE,reported,C8snoN
7,88730262,G,A,-0.000782178,0.000175185,8.00E-06,0.525403,462933,3292,rs10952949,459641,TRUE,reported,C8snoN
7,88731343,T,C,-0.000781223,0.000175227,8.30E-06,0.525415,462933,3292,rs2373838,459641,TRUE,reported,C8snoN
7,88731811,C,T,-0.00077396,0.000175237,1.00E-05,0.524124,462933,3292,rs1121279,459641,TRUE,reported,C8snoN
7,88732470,A,T,-0.000775671,0.000177482,1.20E-05,0.525365,462933,3292,rs11975470,459641,TRUE,reported,C8snoN
7,88732949,G,A,-0.000787218,0.000179092,1.10E-05,0.525797,462933,3292,rs2373839,459641,TRUE,reported,C8snoN
7,96039648,C,G,-0.000820904,0.000192924,2.10E-05,0.696688,462933,3292,rs6971575,459641,TRUE,reported,C8snoN
7,123408050,G,A,0.000805313,0.000178917,6.80E-06,0.391845,462933,3292,rs600420,459641,TRUE,reported,C8snoN
7,123413707,A,G,0.000801178,0.000178876,7.50E-06,0.392089,462933,3292,rs631445,459641,TRUE,reported,C8snoN
7,123414591,T,A,0.000801272,0.000178875,7.50E-06,0.392088,462933,3292,rs600081,459641,TRUE,reported,C8snoN
7,123420442,C,A,0.000801942,0.000178879,7.40E-06,0.392064,462933,3292,rs688242,459641,TRUE,reported,C8snoN
7,123421662,G,A,0.00080168,0.000178877,7.40E-06,0.392076,462933,3292,rs2429618,459641,TRUE,reported,C8snoN
7,123422445,A,T,0.000806768,0.000178877,6.50E-06,0.392052,462933,3292,rs605674,459641,TRUE,reported,C8snoN
7,123426949,A,G,0.000811477,0.000178865,5.70E-06,0.391983,462933,3292,rs616297,459641,TRUE,reported,C8snoN
7,123427568,G,A,0.000803411,0.000178992,7.20E-06,0.39184,462933,3292,rs603060,459641,TRUE,reported,C8snoN
7,123430012,A,G,0.000808669,0.000179122,6.30E-06,0.392847,462933,3292,rs2429620,459641,TRUE,reported,C8snoN
7,123430316,A,G,0.000831711,0.000179277,3.50E-06,0.389867,462933,3292,rs2429621,459641,TRUE,reported,C8snoN
7,123431594,A,C,0.000836095,0.000179285,3.10E-06,0.39007,462933,3292,rs662705,459641,TRUE,reported,C8snoN
7,123441400,T,C,0.000817647,0.000179777,5.40E-06,0.397364,462933,3292,rs2456552,459641,TRUE,reported,C8snoN
7,123442156,G,A,0.000813819,0.000179796,6.00E-06,0.396971,462933,3292,rs633590,459641,TRUE,reported,C8snoN
7,123442702,C,T,0.00082267,0.000179905,4.80E-06,0.393809,462933,3292,rs643084,459641,TRUE,reported,C8snoN
8,127180687,T,A,0.0011792,0.000271204,1.40E-05,0.120965,462933,3292,rs7819842,459641,TRUE,reported,C8snoN
8,127184801,A,G,0.00118573,0.000272062,1.30E-05,0.120336,462933,3292,rs41498748,459641,TRUE,reported,C8snoN
8,127184851,G,T,0.00119565,0.000272057,1.10E-05,0.120377,462933,3292,rs74628826,459641,TRUE,reported,C8snoN
8,141709868,T,C,0.000717152,0.00017595,4.60E-05,0.545258,462933,3292,rs10112148,459641,TRUE,reported,C8snoN
8,141711951,T,C,0.000714301,0.000175976,4.90E-05,0.545596,462933,3292,rs11986785,459641,TRUE,reported,C8snoN
8,141719251,A,G,0.000716004,0.00017589,4.70E-05,0.545457,462933,3292,rs11166995,459641,TRUE,reported,C8snoN
8,141721788,T,C,0.000727606,0.00017602,3.60E-05,0.550953,462933,3292,rs7461251,459641,TRUE,reported,C8snoN
8,141722660,A,G,0.000730076,0.000175993,3.30E-05,0.551008,462933,3292,rs11166996,459641,TRUE,reported,C8snoN
8,141725834,T,C,0.00073122,0.000175979,3.30E-05,0.551071,462933,3292,rs4543590,459641,TRUE,reported,C8snoN
8,141727310,T,G,0.000728449,0.000175973,3.50E-05,0.551074,462933,3292,rs13280245,459641,TRUE,reported,C8snoN
8,141730727,T,G,0.000725641,0.000175971,3.70E-05,0.551099,462933,3292,rs13276301,459641,TRUE,reported,C8snoN
8,141731000,A,G,0.000723942,0.00017599,3.90E-05,0.551205,462933,3292,rs11783573,459641,TRUE,reported,C8snoN
8,141735794,T,G,0.000729101,0.00017596,3.40E-05,0.551211,462933,3292,rs11783270,459641,TRUE,reported,C8snoN
8,141741118,C,T,-0.000732491,0.000175918,3.10E-05,0.449156,462933,3292,rs6578131,459641,TRUE,reported,C8snoN
8,141741468,G,A,-0.000731505,0.000175929,3.20E-05,0.449072,462933,3292,rs4961288,459641,TRUE,reported,C8snoN
8,141744917,G,A,-0.000717006,0.000176235,4.70E-05,0.443182,462933,3292,rs45613837,459641,TRUE,reported,C8snoN
8,141746995,T,G,-0.000720377,0.000175788,4.20E-05,0.447259,462933,3292,rs57416159,459641,TRUE,reported,C8snoN
8,141748265,G,T,-0.000746071,0.000175777,2.20E-05,0.44647,462933,3292,rs4961289,459641,TRUE,reported,C8snoN
8,141750673,C,T,-0.000729831,0.000175668,3.30E-05,0.448729,462933,3292,rs4445273,459641,TRUE,reported,C8snoN
8,141751712,C,A,-0.000732872,0.000175656,3.00E-05,0.44865,462933,3292,rs4961290,459641,TRUE,reported,C8snoN
8,141754451,G,A,-0.00073661,0.000175656,2.70E-05,0.448743,462933,3292,rs3923115,459641,TRUE,reported,C8snoN
8,141755310,G,A,-0.000741431,0.00017564,2.40E-05,0.448728,462933,3292,rs35426024,459641,TRUE,reported,C8snoN
8,141755859,A,G,-0.00073797,0.000175649,2.70E-05,0.448791,462933,3292,rs4510908,459641,TRUE,reported,C8snoN
8,141762558,G,A,-0.000733454,0.000175664,3.00E-05,0.448594,462933,3292,rs6578132,459641,TRUE,reported,C8snoN
8,141766916,A,G,-0.000729368,0.000175743,3.30E-05,0.449657,462933,3292,rs62524103,459641,TRUE,reported,C8snoN
8,141773852,T,A,-0.000735433,0.000175679,2.80E-05,0.449001,462933,3292,rs6578133,459641,TRUE,reported,C8snoN
8,141774576,A,G,-0.000724836,0.000175672,3.70E-05,0.449123,462933,3292,rs4378011,459641,TRUE,reported,C8snoN
8,141775168,C,A,-0.000733203,0.000175694,3.00E-05,0.448888,462933,3292,rs4246123,459641,TRUE,reported,C8snoN
8,141775337,C,T,-0.000728248,0.000175711,3.40E-05,0.448671,462933,3292,rs4246124,459641,TRUE,reported,C8snoN
8,141777775,A,G,-0.000723886,0.000175679,3.80E-05,0.449128,462933,3292,rs4961291,459641,TRUE,reported,C8snoN
8,141778649,G,A,-0.000723458,0.000175715,3.80E-05,0.450839,462933,3292,rs6578135,459641,TRUE,reported,C8snoN
8,141778693,T,G,-0.000720199,0.000175701,4.10E-05,0.450925,462933,3292,rs4554515,459641,TRUE,reported,C8snoN
8,141779826,C,A,-0.00073247,0.000175697,3.10E-05,0.448881,462933,3292,rs10875458,459641,TRUE,reported,C8snoN
8,141790481,A,C,-0.000720972,0.000175861,4.10E-05,0.448825,462933,3292,rs7843014,459641,TRUE,reported,C8snoN
8,141790892,C,A,-0.000737958,0.000175785,2.70E-05,0.448475,462933,3292,rs4246126,459641,TRUE,reported,C8snoN
8,141807467,A,G,-0.000717744,0.000176218,4.60E-05,0.438325,462933,3292,rs62524109,459641,TRUE,reported,C8snoN
8,141808948,C,G,-0.000727297,0.000175765,3.50E-05,0.448796,462933,3292,rs4961233,459641,TRUE,reported,C8snoN
8,141812374,C,T,-0.000723046,0.000175774,3.90E-05,0.448613,462933,3292,rs4961293,459641,TRUE,reported,C8snoN
8,141814665,A,T,-0.000725692,0.000175745,3.60E-05,0.448843,462933,3292,rs7839697,459641,TRUE,reported,C8snoN
8,141824906,C,A,-0.000719936,0.000175802,4.20E-05,0.44828,462933,3292,rs4531098,459641,TRUE,reported,C8snoN
8,141824972,G,C,-0.000720083,0.000175803,4.20E-05,0.448284,462933,3292,rs4604495,459641,TRUE,reported,C8snoN
8,141825269,G,T,-0.000719641,0.000175806,4.30E-05,0.448268,462933,3292,rs4480166,459641,TRUE,reported,C8snoN
8,141825581,G,C,-0.000715196,0.000175774,4.70E-05,0.448628,462933,3292,rs4961296,459641,TRUE,reported,C8snoN
8,141826138,T,C,-0.000725671,0.000175789,3.70E-05,0.448583,462933,3292,rs4291312,459641,TRUE,reported,C8snoN
8,141826739,C,T,-0.000722419,0.000175802,4.00E-05,0.448455,462933,3292,rs10090774,459641,TRUE,reported,C8snoN
8,141829810,G,A,-0.000721165,0.000175799,4.10E-05,0.448366,462933,3292,rs11166999,459641,TRUE,reported,C8snoN
8,141830437,A,T,-0.00072174,0.000175795,4.00E-05,0.448382,462933,3292,rs7001489,459641,TRUE,reported,C8snoN
8,141831241,T,C,-0.000722054,0.000175797,4.00E-05,0.448402,462933,3292,rs7010459,459641,TRUE,reported,C8snoN
8,141833530,G,A,-0.000719898,0.000175786,4.20E-05,0.448477,462933,3292,rs6578139,459641,TRUE,reported,C8snoN
8,141834000,G,A,-0.000723713,0.00017579,3.80E-05,0.448456,462933,3292,rs7001591,459641,TRUE,reported,C8snoN
8,141834110,T,A,-0.000723603,0.000175789,3.80E-05,0.44846,462933,3292,rs6578140,459641,TRUE,reported,C8snoN
8,141838226,C,T,-0.000728738,0.000175748,3.40E-05,0.448674,462933,3292,rs10088621,459641,TRUE,reported,C8snoN
8,141838412,C,T,-0.000728755,0.000175756,3.40E-05,0.448679,462933,3292,rs7826800,459641,TRUE,reported,C8snoN
8,141839234,G,A,-0.000728597,0.000175743,3.40E-05,0.448664,462933,3292,rs4961297,459641,TRUE,reported,C8snoN
8,141840168,A,G,-0.000719829,0.000175729,4.20E-05,0.448833,462933,3292,rs4434666,459641,TRUE,reported,C8snoN
8,141840645,G,A,-0.000728809,0.000175744,3.40E-05,0.448687,462933,3292,rs4246127,459641,TRUE,reported,C8snoN
8,141840739,G,A,-0.000729225,0.000175747,3.30E-05,0.448697,462933,3292,rs4246128,459641,TRUE,reported,C8snoN
8,141841577,A,G,0.0007313,0.00017574,3.20E-05,0.551225,462933,3292,rs13251663,459641,TRUE,reported,C8snoN
8,141847666,A,G,0.000737718,0.000175885,2.70E-05,0.552916,462933,3292,rs10090297,459641,TRUE,reported,C8snoN
8,141848241,G,A,0.000724609,0.000175914,3.80E-05,0.552503,462933,3292,rs6982216,459641,TRUE,reported,C8snoN
8,141854509,G,C,0.000726622,0.000175746,3.60E-05,0.551262,462933,3292,rs11167002,459641,TRUE,reported,C8snoN
8,141854956,T,C,0.000735582,0.000175866,2.90E-05,0.550164,462933,3292,rs13256088,459641,TRUE,reported,C8snoN
8,141854964,T,C,0.000731505,0.000175891,3.20E-05,0.549961,462933,3292,rs13256101,459641,TRUE,reported,C8snoN
8,141855093,C,T,0.000730439,0.000175749,3.20E-05,0.551255,462933,3292,rs11787521,459641,TRUE,reported,C8snoN
8,141857154,C,T,0.000725675,0.000175735,3.60E-05,0.550947,462933,3292,rs10094003,459641,TRUE,reported,C8snoN
8,141857322,A,C,-0.000720864,0.000175793,4.10E-05,0.447251,462933,3292,rs4327896,459641,TRUE,reported,C8snoN
8,141858620,T,C,0.000715115,0.00017602,4.90E-05,0.556642,462933,3292,rs10087782,459641,TRUE,reported,C8snoN
8,141860895,G,C,0.00071556,0.000176004,4.80E-05,0.55659,462933,3292,rs10105905,459641,TRUE,reported,C8snoN
8,141861738,G,A,0.000714977,0.000176018,4.90E-05,0.55667,462933,3292,rs11997647,459641,TRUE,reported,C8snoN
8,141862562,T,C,0.000714748,0.000176003,4.90E-05,0.556568,462933,3292,rs11785111,459641,TRUE,reported,C8snoN
8,141862791,G,A,0.000715658,0.000175996,4.80E-05,0.55653,462933,3292,rs13282141,459641,TRUE,reported,C8snoN
8,141864096,A,G,0.000715663,0.00017601,4.80E-05,0.556535,462933,3292,rs11786116,459641,TRUE,reported,C8snoN
8,141875162,T,G,0.000713557,0.000176012,5.00E-05,0.55658,462933,3292,rs13265942,459641,TRUE,reported,C8snoN
8,141895696,C,G,0.000713956,0.000175791,4.90E-05,0.551297,462933,3292,rs11998619,459641,TRUE,reported,C8snoN
8,141896254,G,A,0.000713677,0.000175786,4.90E-05,0.551264,462933,3292,rs1868280,459641,TRUE,reported,C8snoN
8,141904388,A,G,0.000714591,0.000175797,4.80E-05,0.55174,462933,3292,rs1448226,459641,TRUE,reported,C8snoN
9,86964718,T,A,-0.000825454,0.000193134,1.90E-05,0.316464,462933,3292,rs17087144,459641,TRUE,reported,C8snoN
10,8504400,C,G,-0.000860452,0.000202725,2.20E-05,0.749506,462933,3292,rs11255705,459641,TRUE,reported,C8snoN
10,8505077,A,T,-0.000827488,0.000203515,4.80E-05,0.752724,462933,3292,rs10905379,459641,TRUE,reported,C8snoN
10,8506929,C,T,-0.000971774,0.000213737,5.50E-06,0.786389,462933,3292,rs10737030,459641,TRUE,reported,C8snoN
10,8507331,T,C,-0.000977292,0.000214881,5.40E-06,0.78993,462933,3292,rs7084091,459641,TRUE,reported,C8snoN
10,8508246,A,G,-0.000915086,0.000211156,1.50E-05,0.780433,462933,3292,rs6602311,459641,TRUE,reported,C8snoN
10,8509090,C,G,-0.000912634,0.000211148,1.50E-05,0.780319,462933,3292,rs10905380,459641,TRUE,reported,C8snoN
10,85672085,C,T,0.000719822,0.000176746,4.60E-05,0.435597,462933,3292,rs12414859,459641,TRUE,reported,C8snoN
10,85672814,G,A,0.00072473,0.000176659,4.10E-05,0.435179,462933,3292,rs10788293,459641,TRUE,reported,C8snoN
10,85673201,C,A,0.00072144,0.000176596,4.40E-05,0.435767,462933,3292,rs11200730,459641,TRUE,reported,C8snoN
10,85674138,C,T,0.0007308,0.000176631,3.50E-05,0.432382,462933,3292,rs12415643,459641,TRUE,reported,C8snoN
10,85674842,T,C,0.000725958,0.00017653,3.90E-05,0.43258,462933,3292,rs1892019,459641,TRUE,reported,C8snoN
10,85675348,C,T,0.000729529,0.000176525,3.60E-05,0.427823,462933,3292,rs2349764,459641,TRUE,reported,C8snoN
11,22373396,A,G,0.00116354,0.000279708,3.20E-05,0.112605,462933,3292,rs35420106,459641,TRUE,reported,C8snoN
11,116254118,G,A,0.000904072,0.000216733,3.00E-05,0.231993,462933,3292,rs55996111,459641,TRUE,reported,C8snoN
11,134749163,T,C,0.000736397,0.000176751,3.10E-05,0.50006,462933,3292,rs2136099,459641,TRUE,reported,C8snoN
11,134749911,G,A,0.000728067,0.00017466,3.10E-05,0.493226,462933,3292,rs7939914,459641,TRUE,reported,C8snoN
11,134761316,A,G,-0.000786195,0.000181623,1.50E-05,0.401262,462933,3292,rs10894898,459641,TRUE,reported,C8snoN
12,6344174,A,G,-0.000784408,0.000177852,1.00E-05,0.595994,462933,3292,rs3181295,459641,TRUE,reported,C8snoN
12,67409191,C,T,-0.000710991,0.000175314,5.00E-05,0.502163,462933,3292,rs774398,459641,TRUE,reported,C8snoN
12,67410013,C,T,0.000712214,0.000175306,4.90E-05,0.49776,462933,3292,rs774397,459641,TRUE,reported,C8snoN
12,72641836,C,T,0.00102617,0.000252814,4.90E-05,0.859234,462933,3292,rs4315124,459641,TRUE,reported,C8snoN
12,72641864,C,T,0.0010257,0.000252806,5.00E-05,0.859193,462933,3292,rs4315125,459641,TRUE,reported,C8snoN
12,109000787,C,G,0.000776937,0.000189083,4.00E-05,0.311073,462933,3292,rs28712877,459641,TRUE,reported,C8snoN
12,130234919,C,T,-0.000726895,0.000175371,3.40E-05,0.53712,462933,3292,rs7968433,459641,TRUE,reported,C8snoN
13,38066645,A,G,0.00114,0.000271946,2.80E-05,0.127767,462933,3292,rs35502536,459641,TRUE,reported,C8snoN
14,34813050,A,G,0.00107976,0.000248862,1.40E-05,0.701834,462933,3292,rs1888097,459641,TRUE,reported,C8snoN
14,104908022,G,A,0.00118233,0.000285393,3.40E-05,0.107104,462933,3292,rs35466827,459641,TRUE,reported,C8snoN
14,104908412,T,C,0.00116105,0.000266927,1.40E-05,0.122671,462933,3292,rs28461670,459641,TRUE,reported,C8snoN
14,104908509,A,C,0.00114851,0.000265598,1.50E-05,0.124332,462933,3292,rs28373833,459641,TRUE,reported,C8snoN
14,104908584,G,A,0.00116091,0.00026739,1.40E-05,0.12224,462933,3292,rs57714398,459641,TRUE,reported,C8snoN
14,104908722,G,T,0.0011539,0.000267062,1.60E-05,0.122516,462933,3292,rs11851580,459641,TRUE,reported,C8snoN
14,104909461,G,A,0.00116124,0.00026794,1.50E-05,0.121457,462933,3292,rs12880001,459641,TRUE,reported,C8snoN
14,104909952,G,A,0.00116307,0.000268032,1.40E-05,0.12138,462933,3292,rs12880721,459641,TRUE,reported,C8snoN
14,104909981,T,C,0.00114371,0.000267083,1.90E-05,0.122256,462933,3292,rs34552840,459641,TRUE,reported,C8snoN
14,104910402,A,G,0.0011286,0.000265314,2.10E-05,0.123826,462933,3292,rs11847587,459641,TRUE,reported,C8snoN
14,104910564,G,C,0.00114288,0.000266871,1.80E-05,0.122325,462933,3292,rs73352180,459641,TRUE,reported,C8snoN
14,104917657,G,A,0.0011455,0.000267936,1.90E-05,0.122269,462933,3292,rs35054160,459641,TRUE,reported,C8snoN
14,104917800,C,T,0.00114564,0.00026799,1.90E-05,0.122234,462933,3292,rs34197832,459641,TRUE,reported,C8snoN
14,104929714,G,A,0.00117684,0.000270641,1.40E-05,0.120252,462933,3292,rs77647965,459641,TRUE,reported,C8snoN
14,104929715,G,C,0.00117678,0.000270642,1.40E-05,0.120253,462933,3292,rs75207212,459641,TRUE,reported,C8snoN
14,104930719,T,C,0.00118037,0.00026948,1.20E-05,0.121008,462933,3292,rs35252693,459641,TRUE,reported,C8snoN
14,104931191,G,A,0.00117238,0.00026951,1.40E-05,0.120831,462933,3292,rs79414834,459641,TRUE,reported,C8snoN
15,50380740,G,A,-0.000873487,0.00021516,4.90E-05,0.208882,462933,3292,rs7172916,459641,TRUE,reported,C8snoN
16,81972283,T,G,-0.000750341,0.000177179,2.30E-05,0.572252,462933,3292,rs12596299,459641,TRUE,reported,C8snoN
18,71098444,T,A,-0.000750924,0.000177876,2.40E-05,0.415291,462933,3292,rs2849350,459641,TRUE,reported,C8snoN
18,71098470,C,T,-0.00075421,0.000177872,2.20E-05,0.415124,462933,3292,rs2850460,459641,TRUE,reported,C8snoN
18,71098953,T,C,0.000742049,0.000177803,3.00E-05,0.584024,462933,3292,rs4630642,459641,TRUE,reported,C8snoN
18,71099538,G,A,-0.000736746,0.000177853,3.40E-05,0.415403,462933,3292,rs1942787,459641,TRUE,reported,C8snoN
18,71099841,T,C,-0.000738217,0.000177836,3.30E-05,0.41539,462933,3292,rs1942786,459641,TRUE,reported,C8snoN
18,71100085,C,T,0.000738586,0.000177746,3.20E-05,0.583344,462933,3292,rs7244061,459641,TRUE,reported,C8snoN
18,71100319,C,T,-0.000736214,0.000177807,3.50E-05,0.415864,462933,3292,rs2850457,459641,TRUE,reported,C8snoN
18,71100418,C,A,0.000738424,0.000177806,3.30E-05,0.583741,462933,3292,rs7229293,459641,TRUE,reported,C8snoN
18,71100558,T,A,0.000738787,0.000177812,3.30E-05,0.58371,462933,3292,rs7230688,459641,TRUE,reported,C8snoN
18,71100959,C,T,0.000739032,0.000177831,3.20E-05,0.583594,462933,3292,rs12456976,459641,TRUE,reported,C8snoN
18,71100977,C,T,0.000738836,0.000177833,3.30E-05,0.583575,462933,3292,rs1942780,459641,TRUE,reported,C8snoN
18,71101390,C,G,0.000746554,0.000177754,2.70E-05,0.584537,462933,3292,rs4462699,459641,TRUE,reported,C8snoN
18,71101501,C,T,-0.000746097,0.000177719,2.70E-05,0.415129,462933,3292,rs2850456,459641,TRUE,reported,C8snoN
18,71101560,T,C,0.000743196,0.000177652,2.90E-05,0.583955,462933,3292,rs4257295,459641,TRUE,reported,C8snoN
18,71104371,G,T,-0.000717983,0.000176408,4.70E-05,0.430641,462933,3292,rs1942793,459641,TRUE,reported,C8snoN
18,71105757,T,C,-0.000741916,0.000177465,2.90E-05,0.416619,462933,3292,rs6566729,459641,TRUE,reported,C8snoN
18,71105818,T,C,-0.000744062,0.000177471,2.80E-05,0.416446,462933,3292,rs1942795,459641,TRUE,reported,C8snoN
18,71106186,C,T,-0.000742963,0.000177532,2.90E-05,0.416013,462933,3292,rs1942796,459641,TRUE,reported,C8snoN
18,71106570,G,C,-0.000745514,0.000177504,2.70E-05,0.416494,462933,3292,rs8097766,459641,TRUE,reported,C8snoN
18,71106755,C,T,-0.000744889,0.000177511,2.70E-05,0.416466,462933,3292,rs8097817,459641,TRUE,reported,C8snoN
18,71106858,T,C,-0.000743358,0.00017752,2.80E-05,0.416703,462933,3292,rs8098925,459641,TRUE,reported,C8snoN
19,2973846,C,T,0.000834762,0.000198861,2.70E-05,0.272859,462933,3292,rs112873699,459641,TRUE,reported,C8snoN
19,51766288,G,T,-0.000732634,0.000176415,3.30E-05,0.468961,462933,3292,rs2455072,459641,TRUE,reported,C8snoN
19,51767205,C,T,-0.000757868,0.000176277,1.70E-05,0.477708,462933,3292,rs6509523,459641,TRUE,reported,C8snoN
20,57134366,G,A,0.000879377,0.000216922,5.00E-05,0.20831,462933,3292,rs6070510,459641,TRUE,reported,C8snoN
20,57139164,T,C,0.000890493,0.000216428,3.90E-05,0.208615,462933,3292,rs6128369,459641,TRUE,reported,C8snoN
20,57139290,T,C,0.000890212,0.000216424,3.90E-05,0.208567,462933,3292,rs761578,459641,TRUE,reported,C8snoN
20,57139369,C,T,0.000886331,0.000216471,4.20E-05,0.208486,462933,3292,rs2017447,459641,TRUE,reported,C8snoN
20,57142573,T,C,0.000905979,0.000218886,3.50E-05,0.200263,462933,3292,rs6015307,459641,TRUE,reported,C8snoN
20,57149503,C,T,0.000917414,0.000223461,4.00E-05,0.194982,462933,3292,rs6128373,459641,TRUE,reported,C8snoN
20,57150708,C,T,0.000922131,0.000223643,3.70E-05,0.194861,462933,3292,rs1886840,459641,TRUE,reported,C8snoN
22,43577048,C,A,-0.000730448,0.000177699,3.90E-05,0.410016,462933,3292,rs2071724,459641,TRUE,reported,C8snoN

## Sheet: Supplement 3.forward MR analyse
other_allele.exposure,effect_allele.exposure,beta.exposure,se.exposure,eaf.exposure,samplesize.exposure,SNP,exposure,mr_keep.exposure,pval.exposure,pval_origin.exposure,id.exposure,data_source.exposure
T,G,0.00381807,0.000901961,0.077584,462933,rs76133100,exposure,TRUE,2.31E-05,inferred,e55qKR,textfile
C,T,0.00265352,0.000610647,0.194799,462933,rs79769442,exposure,TRUE,1.39E-05,inferred,e55qKR,textfile
G,A,-0.00793204,0.00171946,0.020381,462933,rs114990209,exposure,TRUE,3.97E-06,inferred,e55qKR,textfile
T,C,0.00207505,0.000495132,0.390717,462933,rs10443218,exposure,TRUE,2.78E-05,inferred,e55qKR,textfile
T,C,-0.00483569,0.00119193,0.044301,462933,rs114473590,exposure,TRUE,4.97E-05,inferred,e55qKR,textfile
A,T,-0.00254402,0.000483571,0.49715,462933,rs12034885,exposure,TRUE,1.43E-07,inferred,e55qKR,textfile
T,A,0.00448759,0.00106098,0.056668,462933,rs61807307,exposure,TRUE,2.34E-05,inferred,e55qKR,textfile
A,G,0.00208356,0.000512932,0.668323,462933,rs2499839,exposure,TRUE,4.86E-05,inferred,e55qKR,textfile
T,C,0.00226945,0.000526474,0.306294,462933,rs58473710,exposure,TRUE,1.63E-05,inferred,e55qKR,textfile
C,T,-0.00747276,0.0017499,0.02375,462933,rs150810874,exposure,TRUE,1.95E-05,inferred,e55qKR,textfile
G,T,-0.00231588,0.000505215,0.631049,462933,rs7514305,exposure,TRUE,4.56E-06,inferred,e55qKR,textfile
A,G,-0.00498241,0.00116766,0.044665,462933,rs28359708,exposure,TRUE,1.98E-05,inferred,e55qKR,textfile
T,C,0.00835279,0.00199956,0.016384,462933,rs139257387,exposure,TRUE,2.95E-05,inferred,e55qKR,textfile
A,C,0.00229544,0.000556058,0.252242,462933,rs7424130,exposure,TRUE,3.66E-05,inferred,e55qKR,textfile
C,T,0.00207638,0.000495098,0.403011,462933,rs12995836,exposure,TRUE,2.74E-05,inferred,e55qKR,textfile
A,G,-0.00234974,0.000484344,0.491207,462933,rs12473198,exposure,TRUE,1.23E-06,inferred,e55qKR,textfile
G,A,-0.00212865,0.000483806,0.492396,462933,rs1441104,exposure,TRUE,1.08E-05,inferred,e55qKR,textfile
G,A,-0.00229728,0.000532474,0.289889,462933,rs752973,exposure,TRUE,1.60E-05,inferred,e55qKR,textfile
A,G,0.00254389,0.000551995,0.2673,462933,rs4405712,exposure,TRUE,4.06E-06,inferred,e55qKR,textfile
T,C,-0.00278929,0.000653951,0.163686,462933,rs62188172,exposure,TRUE,2.00E-05,inferred,e55qKR,textfile
A,G,-0.00208693,0.000493241,0.605185,462933,rs17815942,exposure,TRUE,2.33E-05,inferred,e55qKR,textfile
A,G,-0.00321884,0.000678616,0.851012,462933,rs1430674,exposure,TRUE,2.10E-06,inferred,e55qKR,textfile
C,A,-0.00461873,0.000919299,0.074505,462933,rs78943553,exposure,TRUE,5.06E-07,inferred,e55qKR,textfile
G,A,0.00201042,0.000484981,0.475955,462933,rs2551972,exposure,TRUE,3.39E-05,inferred,e55qKR,textfile
A,C,0.00278348,0.000665796,0.156745,462933,rs13026974,exposure,TRUE,2.91E-05,inferred,e55qKR,textfile
C,T,0.00461596,0.00108021,0.947329,462933,rs617156,exposure,TRUE,1.93E-05,inferred,e55qKR,textfile
A,G,-0.00255744,0.000599687,0.203361,462933,rs9828050,exposure,TRUE,2.00E-05,inferred,e55qKR,textfile
A,G,-0.0021326,0.000524089,0.308506,462933,rs13082658,exposure,TRUE,4.72E-05,inferred,e55qKR,textfile
C,T,0.00449503,0.00106019,0.054876,462933,rs17075984,exposure,TRUE,2.24E-05,inferred,e55qKR,textfile
C,T,-0.0022759,0.000488218,0.574571,462933,rs12487736,exposure,TRUE,3.14E-06,inferred,e55qKR,textfile
T,C,-0.00205295,0.000501512,0.380349,462933,rs13071208,exposure,TRUE,4.25E-05,inferred,e55qKR,textfile
A,C,0.00408933,0.000958278,0.072632,462933,rs114291484,exposure,TRUE,1.98E-05,inferred,e55qKR,textfile
C,G,0.00809783,0.00190551,0.017,462933,rs113678494,exposure,TRUE,2.14E-05,inferred,e55qKR,textfile
T,G,0.00271971,0.000632425,0.177169,462933,rs792359,exposure,TRUE,1.70E-05,inferred,e55qKR,textfile
G,A,0.00508492,0.00124553,0.041352,462933,rs73193535,exposure,TRUE,4.45E-05,inferred,e55qKR,textfile
G,T,-0.00472835,0.00110369,0.061864,462933,rs71595703,exposure,TRUE,1.83E-05,inferred,e55qKR,textfile
G,A,0.00752841,0.00178279,0.019544,462933,rs10017542,exposure,TRUE,2.41E-05,inferred,e55qKR,textfile
C,T,-0.00215448,0.000506424,0.349808,462933,rs13148506,exposure,TRUE,2.10E-05,inferred,e55qKR,textfile
C,A,0.00831482,0.00190164,0.017397,462933,rs74887225,exposure,TRUE,1.23E-05,inferred,e55qKR,textfile
C,G,0.00222016,0.000527754,0.696811,462933,rs6851651,exposure,TRUE,2.59E-05,inferred,e55qKR,textfile
A,G,0.00234424,0.000482698,0.509235,462933,rs12507345,exposure,TRUE,1.19E-06,inferred,e55qKR,textfile
G,A,0.00204828,0.000495582,0.399311,462933,rs34341354,exposure,TRUE,3.58E-05,inferred,e55qKR,textfile
A,T,0.00260137,0.000501953,0.367495,462933,rs10942927,exposure,TRUE,2.19E-07,inferred,e55qKR,textfile
A,C,-0.00871964,0.00210057,0.013428,462933,rs75983158,exposure,TRUE,3.31E-05,inferred,e55qKR,textfile
A,G,-0.00229022,0.000504387,0.359756,462933,rs6452969,exposure,TRUE,5.61E-06,inferred,e55qKR,textfile
C,T,-0.0077883,0.00166781,0.021757,462933,rs115214645,exposure,TRUE,3.02E-06,inferred,e55qKR,textfile
G,A,0.00323193,0.000704283,0.140221,462933,rs58457416,exposure,TRUE,4.45E-06,inferred,e55qKR,textfile
T,C,-0.00347114,0.000826966,0.095621,462933,rs17105304,exposure,TRUE,2.70E-05,inferred,e55qKR,textfile
G,A,0.00273677,0.000672559,0.169842,462933,rs73801216,exposure,TRUE,4.72E-05,inferred,e55qKR,textfile
G,A,0.00345768,0.00085054,0.08828,462933,rs17568223,exposure,TRUE,4.80E-05,inferred,e55qKR,textfile
A,G,0.00475305,0.00113117,0.049514,462933,rs273081,exposure,TRUE,2.65E-05,inferred,e55qKR,textfile
G,A,-0.00862897,0.00176269,0.019235,462933,rs13192131,exposure,TRUE,9.81E-07,inferred,e55qKR,textfile
T,C,0.00220533,0.00049338,0.420999,462933,rs849054,exposure,TRUE,7.83E-06,inferred,e55qKR,textfile
G,C,0.0022803,0.000558857,0.248245,462933,rs5030956,exposure,TRUE,4.50E-05,inferred,e55qKR,textfile
C,T,-0.00320747,0.000652839,0.163359,462933,rs853676,exposure,TRUE,8.96E-07,inferred,e55qKR,textfile
C,T,-0.00607066,0.00148414,0.029913,462933,rs141253573,exposure,TRUE,4.31E-05,inferred,e55qKR,textfile
C,T,-0.00263166,0.000644104,0.170675,462933,rs35301711,exposure,TRUE,4.39E-05,inferred,e55qKR,textfile
C,T,-0.00315815,0.000610472,0.194638,462933,rs9398376,exposure,TRUE,2.30E-07,inferred,e55qKR,textfile
T,A,-0.00335649,0.000785809,0.106963,462933,rs12189782,exposure,TRUE,1.94E-05,inferred,e55qKR,textfile
C,T,0.00214471,0.000517752,0.324076,462933,rs10499198,exposure,TRUE,3.44E-05,inferred,e55qKR,textfile
C,T,0.00402627,0.000964728,0.067142,462933,rs73577279,exposure,TRUE,3.00E-05,inferred,e55qKR,textfile
T,C,0.0024699,0.000606561,0.197213,462933,rs627882,exposure,TRUE,4.66E-05,inferred,e55qKR,textfile
G,A,0.00291681,0.000490398,0.410759,462933,rs3807866,exposure,TRUE,2.72E-09,inferred,e55qKR,textfile
A,G,-0.00262135,0.000502273,0.630534,462933,rs4722028,exposure,TRUE,1.80E-07,inferred,e55qKR,textfile
T,C,-0.00244391,0.00049807,0.378437,462933,rs10225041,exposure,TRUE,9.26E-07,inferred,e55qKR,textfile
G,A,0.0021725,0.000508617,0.348484,462933,rs13233747,exposure,TRUE,1.94E-05,inferred,e55qKR,textfile
A,G,0.00825826,0.00201482,0.014565,462933,rs118125989,exposure,TRUE,4.15E-05,inferred,e55qKR,textfile
C,T,0.00530298,0.00129786,0.035968,462933,rs17863146,exposure,TRUE,4.39E-05,inferred,e55qKR,textfile
C,A,0.00265113,0.000652778,0.166577,462933,rs62466272,exposure,TRUE,4.88E-05,inferred,e55qKR,textfile
C,A,-0.00228201,0.000496991,0.3938,462933,rs361457,exposure,TRUE,4.40E-06,inferred,e55qKR,textfile
G,A,0.00344724,0.000849736,0.088816,462933,rs35072930,exposure,TRUE,4.97E-05,inferred,e55qKR,textfile
G,A,0.00500356,0.00111538,0.052449,462933,rs112962431,exposure,TRUE,7.26E-06,inferred,e55qKR,textfile
T,A,-0.00236348,0.000574136,0.238521,462933,rs11136574,exposure,TRUE,3.85E-05,inferred,e55qKR,textfile
C,G,-0.00259951,0.000615615,0.191813,462933,rs2979188,exposure,TRUE,2.41E-05,inferred,e55qKR,textfile
T,C,0.00207438,0.000510162,0.655948,462933,rs7016314,exposure,TRUE,4.78E-05,inferred,e55qKR,textfile
A,T,-0.00319839,0.000695319,0.143524,462933,rs2054064,exposure,TRUE,4.23E-06,inferred,e55qKR,textfile
C,T,0.00421441,0.000972037,0.068094,462933,rs17344527,exposure,TRUE,1.45E-05,inferred,e55qKR,textfile
C,T,-0.00242584,0.000485921,0.551344,462933,rs4736824,exposure,TRUE,5.97E-07,inferred,e55qKR,textfile
A,G,-0.00201998,0.000494918,0.482843,462933,rs10100547,exposure,TRUE,4.48E-05,inferred,e55qKR,textfile
C,T,0.00228889,0.000508112,0.637522,462933,rs1512406,exposure,TRUE,6.65E-06,inferred,e55qKR,textfile
C,T,-0.00221736,0.000486411,0.449079,462933,rs10809441,exposure,TRUE,5.15E-06,inferred,e55qKR,textfile
T,C,-0.00266395,0.000613873,0.193399,462933,rs10810848,exposure,TRUE,1.43E-05,inferred,e55qKR,textfile
A,T,0.00315538,0.000734071,0.87535,462933,rs2309981,exposure,TRUE,1.72E-05,inferred,e55qKR,textfile
G,A,0.00827731,0.00178806,0.019522,462933,rs75530143,exposure,TRUE,3.67E-06,inferred,e55qKR,textfile
A,G,0.00255765,0.000536904,0.283887,462933,rs7045289,exposure,TRUE,1.90E-06,inferred,e55qKR,textfile
A,C,-0.0079492,0.00189384,0.017401,462933,rs139387724,exposure,TRUE,2.70E-05,inferred,e55qKR,textfile
T,C,-0.00231934,0.000563144,0.754024,462933,rs1975886,exposure,TRUE,3.81E-05,inferred,e55qKR,textfile
T,G,0.00273291,0.000673183,0.162586,462933,rs61836184,exposure,TRUE,4.91E-05,inferred,e55qKR,textfile
G,T,0.0034717,0.000851943,0.088954,462933,rs61856036,exposure,TRUE,4.60E-05,inferred,e55qKR,textfile
A,G,0.00500646,0.00122665,0.041966,462933,rs150091831,exposure,TRUE,4.48E-05,inferred,e55qKR,textfile
T,C,-0.00608788,0.00134986,0.033052,462933,rs72793123,exposure,TRUE,6.48E-06,inferred,e55qKR,textfile
T,G,-0.0020123,0.000483604,0.495198,462933,rs11196940,exposure,TRUE,3.17E-05,inferred,e55qKR,textfile
G,A,0.00209816,0.00049875,0.615868,462933,rs2944484,exposure,TRUE,2.59E-05,inferred,e55qKR,textfile
G,A,0.00328496,0.000737358,0.877207,462933,rs4131943,exposure,TRUE,8.39E-06,inferred,e55qKR,textfile
G,A,-0.00567671,0.00123485,0.039871,462933,rs77216882,exposure,TRUE,4.28E-06,inferred,e55qKR,textfile
A,G,-0.0024725,0.000515614,0.328459,462933,rs10897304,exposure,TRUE,1.62E-06,inferred,e55qKR,textfile
C,T,-0.00220401,0.000538529,0.283634,462933,rs55994309,exposure,TRUE,4.26E-05,inferred,e55qKR,textfile
C,T,0.00234571,0.000530724,0.299456,462933,rs11213961,exposure,TRUE,9.88E-06,inferred,e55qKR,textfile
C,G,-0.00248163,0.000598572,0.791287,462933,rs471296,exposure,TRUE,3.38E-05,inferred,e55qKR,textfile
C,T,-0.00246301,0.000566809,0.759523,462933,rs6489589,exposure,TRUE,1.39E-05,inferred,e55qKR,textfile
C,T,0.00664545,0.00161617,0.025513,462933,rs73314417,exposure,TRUE,3.92E-05,inferred,e55qKR,textfile
A,G,-0.00204552,0.00048806,0.425229,462933,rs1799632,exposure,TRUE,2.78E-05,inferred,e55qKR,textfile
C,A,0.00229205,0.000561682,0.247252,462933,rs442282,exposure,TRUE,4.49E-05,inferred,e55qKR,textfile
C,T,0.00730751,0.00166456,0.023694,462933,rs77092717,exposure,TRUE,1.13E-05,inferred,e55qKR,textfile
A,C,-0.00542967,0.00128119,0.036769,462933,rs73174625,exposure,TRUE,2.26E-05,inferred,e55qKR,textfile
A,T,0.00525169,0.00102519,0.083736,462933,rs73173375,exposure,TRUE,3.01E-07,inferred,e55qKR,textfile
T,A,0.00235006,0.000558608,0.25199,462933,rs2151397,exposure,TRUE,2.59E-05,inferred,e55qKR,textfile
C,T,0.00328288,0.000779118,0.114691,462933,rs35340239,exposure,TRUE,2.51E-05,inferred,e55qKR,textfile
C,T,0.00455982,0.00103297,0.061498,462933,rs116828880,exposure,TRUE,1.01E-05,inferred,e55qKR,textfile
C,T,0.00544187,0.00126842,0.03684,462933,rs61999849,exposure,TRUE,1.78E-05,inferred,e55qKR,textfile
T,C,-0.00246733,0.000576603,0.771534,462933,rs4904623,exposure,TRUE,1.88E-05,inferred,e55qKR,textfile
T,C,0.00439867,0.000990504,0.064024,462933,rs79027608,exposure,TRUE,8.96E-06,inferred,e55qKR,textfile
T,C,0.00584969,0.00137955,0.033288,462933,rs1483998,exposure,TRUE,2.23E-05,inferred,e55qKR,textfile
T,C,-0.00655283,0.00161185,0.024734,462933,rs140712305,exposure,TRUE,4.79E-05,inferred,e55qKR,textfile
A,G,-0.0021619,0.000484348,0.518346,462933,rs28693900,exposure,TRUE,8.06E-06,inferred,e55qKR,textfile
C,T,0.00254143,0.00059518,0.214392,462933,rs12914876,exposure,TRUE,1.95E-05,inferred,e55qKR,textfile
C,T,0.00718696,0.00155483,0.027194,462933,rs144560187,exposure,TRUE,3.79E-06,inferred,e55qKR,textfile
G,T,-0.00551643,0.00126439,0.037914,462933,rs12440572,exposure,TRUE,1.28E-05,inferred,e55qKR,textfile
G,A,-0.00857451,0.00202187,0.014764,462933,rs117924154,exposure,TRUE,2.23E-05,inferred,e55qKR,textfile
T,C,-0.00754819,0.00159981,0.023799,462933,rs72769061,exposure,TRUE,2.38E-06,inferred,e55qKR,textfile
C,T,0.00198481,0.000486476,0.439713,462933,rs2369818,exposure,TRUE,4.50E-05,inferred,e55qKR,textfile
A,G,0.00206547,0.000498737,0.622798,462933,rs7188873,exposure,TRUE,3.45E-05,inferred,e55qKR,textfile
C,T,-0.00229414,0.000540908,0.285493,462933,rs62031270,exposure,TRUE,2.22E-05,inferred,e55qKR,textfile
C,T,-0.00217605,0.00051843,0.320277,462933,rs12596936,exposure,TRUE,2.70E-05,inferred,e55qKR,textfile
G,A,0.00753378,0.00167143,0.023231,462933,rs118030918,exposure,TRUE,6.56E-06,inferred,e55qKR,textfile
A,G,0.00224765,0.000486214,0.553543,462933,rs7186155,exposure,TRUE,3.79E-06,inferred,e55qKR,textfile
T,C,-0.00214956,0.000519649,0.319807,462933,rs1993766,exposure,TRUE,3.53E-05,inferred,e55qKR,textfile
G,A,0.00257677,0.000620166,0.795199,462933,rs10902641,exposure,TRUE,3.25E-05,inferred,e55qKR,textfile
C,T,0.00575868,0.00131122,0.035134,462933,rs35735275,exposure,TRUE,1.12E-05,inferred,e55qKR,textfile
C,G,0.00808449,0.00192261,0.017189,462933,rs72656915,exposure,TRUE,2.61E-05,inferred,e55qKR,textfile
G,A,0.00214834,0.00050593,0.642322,462933,rs4798766,exposure,TRUE,2.17E-05,inferred,e55qKR,textfile
G,A,-0.00255109,0.000559538,0.287157,462933,rs34846217,exposure,TRUE,5.13E-06,inferred,e55qKR,textfile
A,G,-0.00351909,0.000784394,0.107327,462933,rs56871666,exposure,TRUE,7.24E-06,inferred,e55qKR,textfile
A,C,0.00237946,0.000484881,0.499867,462933,rs1125313,exposure,TRUE,9.23E-07,inferred,e55qKR,textfile
G,T,-0.00480209,0.00107806,0.05343,462933,rs74764573,exposure,TRUE,8.41E-06,inferred,e55qKR,textfile
G,T,-0.00416283,0.00101106,0.062345,462933,rs79708629,exposure,TRUE,3.83E-05,inferred,e55qKR,textfile
T,C,-0.00835683,0.00193796,0.016074,462933,rs78411970,exposure,TRUE,1.62E-05,inferred,e55qKR,textfile
C,T,-0.00394314,0.000882907,0.911588,462933,rs8112110,exposure,TRUE,7.97E-06,inferred,e55qKR,textfile
C,T,0.00472693,0.00113044,0.049474,462933,rs73043387,exposure,TRUE,2.90E-05,inferred,e55qKR,textfile
G,A,0.00275935,0.000604162,0.799572,462933,rs8111479,exposure,TRUE,4.94E-06,inferred,e55qKR,textfile
T,C,0.00362543,0.000788386,0.105693,462933,rs6041529,exposure,TRUE,4.25E-06,inferred,e55qKR,textfile
C,T,-0.00218521,0.000522442,0.688244,462933,rs6087542,exposure,TRUE,2.88E-05,inferred,e55qKR,textfile
C,T,-0.00726092,0.00178868,0.020371,462933,rs116844720,exposure,TRUE,4.92E-05,inferred,e55qKR,textfile
C,T,0.00252642,0.000599046,0.215898,462933,rs3746522,exposure,TRUE,2.47E-05,inferred,e55qKR,textfile
G,C,0.00315404,0.000704386,0.179506,462933,rs143502921,exposure,TRUE,7.54E-06,inferred,e55qKR,textfile
T,C,-0.00387815,0.000877579,0.08306,462933,rs77089704,exposure,TRUE,9.91E-06,inferred,e55qKR,textfile
C,T,0.00613426,0.00145068,0.028755,462933,rs62223478,exposure,TRUE,2.35E-05,inferred,e55qKR,textfile
G,A,-0.00250658,0.000530428,0.293972,462933,rs4434089,exposure,TRUE,2.29E-06,inferred,e55qKR,textfile

## Sheet: Supplement 4. reverse MR analys
other_allele.exposure,effect_allele.exposure,beta.exposure,se.exposure,eaf.exposure,samplesize.exposure,SNP,exposure,mr_keep.exposure,pval.exposure,pval_origin.exposure,id.exposure,data_source.exposure
G,A,0.000818635,0.000189678,0.321782,462933,rs3932686,exposure,TRUE,1.59E-05,inferred,BVSLdm,textfile
G,A,0.000924599,0.000227625,0.192143,462933,rs1987309,exposure,TRUE,4.87E-05,inferred,BVSLdm,textfile
T,A,0.00101568,0.000219556,0.282422,462933,rs3118032,exposure,TRUE,3.73E-06,inferred,BVSLdm,textfile
G,A,0.000734525,0.000180418,0.387234,462933,rs1470438,exposure,TRUE,4.68E-05,inferred,BVSLdm,textfile
G,T,-0.000775247,0.000183201,0.352952,462933,rs4845473,exposure,TRUE,2.32E-05,inferred,BVSLdm,textfile
G,A,-0.000760635,0.000179469,0.422455,462933,rs4925661,exposure,TRUE,2.25E-05,inferred,BVSLdm,textfile
A,T,0.000736667,0.000179801,0.572504,462933,rs6723737,exposure,TRUE,4.18E-05,inferred,BVSLdm,textfile
T,G,0.000751719,0.000177988,0.577504,462933,rs10865358,exposure,TRUE,2.41E-05,inferred,BVSLdm,textfile
G,A,-0.00108907,0.000226942,0.180835,462933,rs7560364,exposure,TRUE,1.60E-06,inferred,BVSLdm,textfile
A,G,0.000969056,0.000236165,0.164851,462933,rs17011693,exposure,TRUE,4.07E-05,inferred,BVSLdm,textfile
G,A,0.000753686,0.000175981,0.4478,462933,rs13021985,exposure,TRUE,1.85E-05,inferred,BVSLdm,textfile
C,T,0.000961771,0.000230813,0.178396,462933,rs1371530,exposure,TRUE,3.09E-05,inferred,BVSLdm,textfile
A,G,0.000759756,0.000183773,0.346564,462933,rs41383244,exposure,TRUE,3.56E-05,inferred,BVSLdm,textfile
G,A,0.0011175,0.000252582,0.143624,462933,rs67573460,exposure,TRUE,9.68E-06,inferred,BVSLdm,textfile
C,G,-0.00072698,0.000176811,0.579921,462933,rs1001284,exposure,TRUE,3.93E-05,inferred,BVSLdm,textfile
T,C,0.00109136,0.000250996,0.141491,462933,rs62254574,exposure,TRUE,1.37E-05,inferred,BVSLdm,textfile
G,A,-0.000788406,0.000183766,0.351465,462933,rs162869,exposure,TRUE,1.78E-05,inferred,BVSLdm,textfile
T,C,0.00074218,0.000177199,0.419752,462933,rs9995232,exposure,TRUE,2.81E-05,inferred,BVSLdm,textfile
C,A,0.000763875,0.00018545,0.349059,462933,rs62307864,exposure,TRUE,3.80E-05,inferred,BVSLdm,textfile
C,A,0.000776882,0.000189132,0.691232,462933,rs6814202,exposure,TRUE,4.00E-05,inferred,BVSLdm,textfile
G,A,-0.000755834,0.000185724,0.670992,462933,rs10017096,exposure,TRUE,4.71E-05,inferred,BVSLdm,textfile
G,C,0.00104851,0.000244352,0.150605,462933,rs1874619,exposure,TRUE,1.78E-05,inferred,BVSLdm,textfile
C,T,0.000785409,0.000177412,0.427545,462933,rs487740,exposure,TRUE,9.55E-06,inferred,BVSLdm,textfile
G,A,-0.000750768,0.000178879,0.393997,462933,rs6861401,exposure,TRUE,2.70E-05,inferred,BVSLdm,textfile
T,C,-0.000874915,0.000207713,0.232024,462933,rs152582,exposure,TRUE,2.53E-05,inferred,BVSLdm,textfile
C,T,0.00100943,0.000228898,0.182577,462933,rs1478364,exposure,TRUE,1.03E-05,inferred,BVSLdm,textfile
A,G,-0.00106922,0.000233754,0.173126,462933,rs3132148,exposure,TRUE,4.78E-06,inferred,BVSLdm,textfile
A,T,0.00108823,0.000264207,0.125147,462933,rs7750405,exposure,TRUE,3.81E-05,inferred,BVSLdm,textfile
G,T,0.000931668,0.00022547,0.184482,462933,rs2465874,exposure,TRUE,3.59E-05,inferred,BVSLdm,textfile
C,G,-0.000742737,0.000183066,0.363057,462933,rs9455911,exposure,TRUE,4.97E-05,inferred,BVSLdm,textfile
C,G,-0.000881899,0.000197588,0.270824,462933,rs13242526,exposure,TRUE,8.07E-06,inferred,BVSLdm,textfile
G,A,0.000815994,0.000178776,0.424853,462933,rs73275098,exposure,TRUE,5.01E-06,inferred,BVSLdm,textfile
C,T,0.00087096,0.000212464,0.214971,462933,rs75640836,exposure,TRUE,4.14E-05,inferred,BVSLdm,textfile
A,G,-0.00078355,0.000175105,0.525342,462933,rs11763136,exposure,TRUE,7.65E-06,inferred,BVSLdm,textfile
C,G,-0.000820904,0.000192924,0.696688,462933,rs6971575,exposure,TRUE,2.09E-05,inferred,BVSLdm,textfile
A,C,0.000836095,0.000179285,0.39007,462933,rs662705,exposure,TRUE,3.11E-06,inferred,BVSLdm,textfile
G,T,0.00119565,0.000272057,0.120377,462933,rs74628826,exposure,TRUE,1.11E-05,inferred,BVSLdm,textfile
G,T,-0.000746071,0.000175777,0.44647,462933,rs4961289,exposure,TRUE,2.19E-05,inferred,BVSLdm,textfile
T,A,-0.000825454,0.000193134,0.316464,462933,rs17087144,exposure,TRUE,1.92E-05,inferred,BVSLdm,textfile
T,C,-0.000977292,0.000214881,0.78993,462933,rs7084091,exposure,TRUE,5.41E-06,inferred,BVSLdm,textfile
C,T,0.0007308,0.000176631,0.432382,462933,rs12415643,exposure,TRUE,3.51E-05,inferred,BVSLdm,textfile
A,G,0.00116354,0.000279708,0.112605,462933,rs35420106,exposure,TRUE,3.18E-05,inferred,BVSLdm,textfile
G,A,0.000904072,0.000216733,0.231993,462933,rs55996111,exposure,TRUE,3.03E-05,inferred,BVSLdm,textfile
A,G,-0.000786195,0.000181623,0.401262,462933,rs10894898,exposure,TRUE,1.50E-05,inferred,BVSLdm,textfile
A,G,-0.000784408,0.000177852,0.595994,462933,rs3181295,exposure,TRUE,1.03E-05,inferred,BVSLdm,textfile
C,T,0.000712214,0.000175306,0.49776,462933,rs774397,exposure,TRUE,4.85E-05,inferred,BVSLdm,textfile
C,T,0.00102617,0.000252814,0.859234,462933,rs4315124,exposure,TRUE,4.93E-05,inferred,BVSLdm,textfile
C,G,0.000776937,0.000189083,0.311073,462933,rs28712877,exposure,TRUE,3.97E-05,inferred,BVSLdm,textfile
C,T,-0.000726895,0.000175371,0.53712,462933,rs7968433,exposure,TRUE,3.40E-05,inferred,BVSLdm,textfile
A,G,0.00114,0.000271946,0.127767,462933,rs35502536,exposure,TRUE,2.76E-05,inferred,BVSLdm,textfile
A,G,0.00107976,0.000248862,0.701834,462933,rs1888097,exposure,TRUE,1.43E-05,inferred,BVSLdm,textfile
T,C,0.00118037,0.00026948,0.121008,462933,rs35252693,exposure,TRUE,1.19E-05,inferred,BVSLdm,textfile
G,A,-0.000873487,0.00021516,0.208882,462933,rs7172916,exposure,TRUE,4.91E-05,inferred,BVSLdm,textfile
T,G,-0.000750341,0.000177179,0.572252,462933,rs12596299,exposure,TRUE,2.29E-05,inferred,BVSLdm,textfile
C,T,-0.00075421,0.000177872,0.415124,462933,rs2850460,exposure,TRUE,2.23E-05,inferred,BVSLdm,textfile
C,T,0.000834762,0.000198861,0.272859,462933,rs112873699,exposure,TRUE,2.70E-05,inferred,BVSLdm,textfile
G,T,-0.000732634,0.000176415,0.468961,462933,rs2455072,exposure,TRUE,3.28E-05,inferred,BVSLdm,textfile
T,C,0.000905979,0.000218886,0.200263,462933,rs6015307,exposure,TRUE,3.49E-05,inferred,BVSLdm,textfile
C,A,-0.000730448,0.000177699,0.410016,462933,rs2071724,exposure,TRUE,3.95E-05,inferred,BVSLdm,textfile

## Sheet: Supplement 5.outcome_1
,SNP,chr.outcome,pos.outcome,other_allele.outcome,effect_allele.outcome,beta.outcome,se.outcome,pval.outcome,eaf.outcome,samplesize.outcome,ncase.outcome,ncontrol.outcome,mr_keep.outcome,pval_origin.outcome,id.outcome
1,rs10100547,8,123853184,A,G,-0.00010902,0.000179006,0.540000299,0.482843,462933,3292,459641,TRUE,reported,zxSz2N
2,rs10225041,7,32489610,T,C,-2.48E-05,0.000180149,0.889999986,0.378437,462933,3292,459641,TRUE,reported,zxSz2N
3,rs10443218,1,40370795,T,C,6.71E-05,0.000179089,0.70999943,0.390717,462933,3292,459641,TRUE,reported,zxSz2N
4,rs10499198,6,138266431,C,T,-0.000283387,0.000187272,0.129999895,0.324076,462933,3292,459641,TRUE,reported,zxSz2N
5,rs10809441,9,11366549,C,T,-0.000215189,0.000175931,0.220000162,0.449079,462933,3292,459641,TRUE,reported,zxSz2N
6,rs10810848,9,17759497,T,C,-0.000223389,0.000222034,0.310000219,0.193399,462933,3292,459641,TRUE,reported,zxSz2N
7,rs10897304,11,62690247,A,G,-2.49E-05,0.000186492,0.889999986,0.328459,462933,3292,459641,TRUE,reported,zxSz2N
8,rs10902641,17,934156,G,A,9.66E-05,0.000224305,0.670000304,0.795199,462933,3292,459641,TRUE,reported,zxSz2N
9,rs10942927,5,71524163,A,T,0.000105111,0.000181559,0.559999965,0.367495,462933,3292,459641,TRUE,reported,zxSz2N
10,rs11136574,8,2939862,T,A,-0.000470808,0.000207658,0.023000115,0.238521,462933,3292,459641,TRUE,reported,zxSz2N
11,rs11196940,10,116593791,T,G,6.26E-05,0.000174913,0.719999177,0.495198,462933,3292,459641,TRUE,reported,zxSz2N
12,rs11213961,11,97961093,C,T,-0.000137803,0.000191957,0.470000154,0.299456,462933,3292,459641,TRUE,reported,zxSz2N
13,rs1125313,18,52859261,A,C,5.54E-05,0.000175371,0.749999545,0.499867,462933,3292,459641,TRUE,reported,zxSz2N
14,rs12034885,1,73651519,A,T,-3.33E-05,0.000174908,0.84999995,0.49715,462933,3292,459641,TRUE,reported,zxSz2N
15,rs12189782,6,102985313,T,A,0.000218704,0.000284228,0.440000328,0.106963,462933,3292,459641,TRUE,reported,zxSz2N
16,rs12473198,2,63428742,A,G,-0.000241781,0.000175189,0.170000031,0.491207,462933,3292,459641,TRUE,reported,zxSz2N
17,rs12487736,3,47459679,C,T,-0.00028696,0.000176587,0.1,0.574571,462933,3292,459641,TRUE,reported,zxSz2N
18,rs12507345,4,165585563,A,G,1.39E-06,0.000174595,0.98999999,0.509235,462933,3292,459641,TRUE,reported,zxSz2N
19,rs12596936,16,52392483,C,T,-0.000152375,0.000187514,0.419999719,0.320277,462933,3292,459641,TRUE,reported,zxSz2N
20,rs12914876,15,49438415,C,T,-4.93E-05,0.000215261,0.82000009,0.214392,462933,3292,459641,TRUE,reported,zxSz2N
21,rs12995836,2,51772064,C,T,4.84E-05,0.000179079,0.789999834,0.403011,462933,3292,459641,TRUE,reported,zxSz2N
22,rs13026974,2,226783922,A,C,-8.89E-05,0.000240821,0.70999943,0.156745,462933,3292,459641,TRUE,reported,zxSz2N
23,rs13071208,3,71201759,T,C,-0.000309098,0.000181395,0.087999459,0.380349,462933,3292,459641,TRUE,reported,zxSz2N
24,rs13082658,3,39376084,A,G,8.98E-05,0.000189561,0.640000038,0.308506,462933,3292,459641,TRUE,reported,zxSz2N
25,rs13148506,4,43123482,C,T,6.18E-05,0.000183172,0.740000478,0.349808,462933,3292,459641,TRUE,reported,zxSz2N
26,rs13233747,7,73149302,G,A,2.18E-05,0.000183964,0.910000016,0.348484,462933,3292,459641,TRUE,reported,zxSz2N
27,rs1430674,2,195925970,A,G,-8.00E-05,0.000245458,0.740000478,0.851012,462933,3292,459641,TRUE,reported,zxSz2N
28,rs143502921,20,59827231,G,C,-5.21E-05,0.000254762,0.840000027,0.179506,462933,3292,459641,TRUE,reported,zxSz2N
29,rs1441104,2,104535716,G,A,-0.000132879,0.000174995,0.450000504,0.492396,462933,3292,459641,TRUE,reported,zxSz2N
30,rs1512406,8,139299165,C,T,-0.000398689,0.000183778,0.029999913,0.637522,462933,3292,459641,TRUE,reported,zxSz2N
31,rs17815942,2,191813539,A,G,9.04E-05,0.000178407,0.610000232,0.605185,462933,3292,459641,TRUE,reported,zxSz2N
32,rs1799632,12,55125787,A,G,-0.000222093,0.000176528,0.209999857,0.425229,462933,3292,459641,TRUE,reported,zxSz2N
33,rs1975886,10,14078220,T,C,-2.87E-05,0.000203681,0.889999986,0.754024,462933,3292,459641,TRUE,reported,zxSz2N
34,rs1993766,16,82873870,T,C,-0.000198697,0.000187955,0.290000001,0.319807,462933,3292,459641,TRUE,reported,zxSz2N
35,rs2054064,8,14905579,A,T,-2.92E-05,0.000251488,0.910000016,0.143524,462933,3292,459641,TRUE,reported,zxSz2N
36,rs2151397,13,66363467,T,A,0.000227984,0.000202037,0.259999792,0.25199,462933,3292,459641,TRUE,reported,zxSz2N
37,rs2309981,9,74172702,A,T,-0.000374123,0.000265508,0.160000006,0.87535,462933,3292,459641,TRUE,reported,zxSz2N
38,rs2369818,16,21614009,C,T,0.000113285,0.000175956,0.519999589,0.439713,462933,3292,459641,TRUE,reported,zxSz2N
39,rs2499839,1,161960782,A,G,-0.000169719,0.000185527,0.359999585,0.668323,462933,3292,459641,TRUE,reported,zxSz2N
40,rs2551972,2,208536856,G,A,-7.56E-05,0.00017542,0.670000304,0.475955,462933,3292,459641,TRUE,reported,zxSz2N
41,rs28693900,15,38856493,A,G,-0.000193362,0.000175176,0.270000147,0.518346,462933,3292,459641,TRUE,reported,zxSz2N
42,rs2944484,10,133004661,G,A,-5.56E-05,0.000180391,0.760000713,0.615868,462933,3292,459641,TRUE,reported,zxSz2N
43,rs2979188,8,8335730,C,G,0.000447813,0.00022266,0.043999729,0.191813,462933,3292,459641,TRUE,reported,zxSz2N
44,rs34341354,5,15678556,G,A,-9.04E-05,0.000179255,0.610000232,0.399311,462933,3292,459641,TRUE,reported,zxSz2N
45,rs34846217,18,38843951,G,A,7.49E-05,0.000202373,0.70999943,0.287157,462933,3292,459641,TRUE,reported,zxSz2N
46,rs35301711,6,83231332,C,T,-4.77E-05,0.000232974,0.840000027,0.170675,462933,3292,459641,TRUE,reported,zxSz2N
47,rs35340239,13,68980988,C,T,0.000290777,0.000281792,0.299999824,0.114691,462933,3292,459641,TRUE,reported,zxSz2N
48,rs361457,7,142143562,C,A,0.000198791,0.000179759,0.270000147,0.3938,462933,3292,459641,TRUE,reported,zxSz2N
49,rs3746522,20,44680412,C,T,0.000230658,0.000216663,0.290000001,0.215898,462933,3292,459641,TRUE,reported,zxSz2N
50,rs3807866,7,12250378,G,A,0.000468005,0.000177374,0.008300036,0.410759,462933,3292,459641,TRUE,reported,zxSz2N
51,rs4131943,11,339969,G,A,0.000119228,0.000266695,0.649999466,0.877207,462933,3292,459641,TRUE,reported,zxSz2N
52,rs4405712,2,153997672,A,G,0.000298831,0.000199659,0.129999895,0.2673,462933,3292,459641,TRUE,reported,zxSz2N
53,rs442282,12,68786416,C,A,-0.000104703,0.000203157,0.610000232,0.247252,462933,3292,459641,TRUE,reported,zxSz2N
54,rs4434089,22,23383863,G,A,-0.000188045,0.000191842,0.330000046,0.293972,462933,3292,459641,TRUE,reported,zxSz2N
55,rs471296,11,123105243,C,G,-0.000102594,0.000216497,0.640000038,0.791287,462933,3292,459641,TRUE,reported,zxSz2N
56,rs4722028,7,21462121,A,G,-0.000487187,0.000181669,0.007299952,0.630534,462933,3292,459641,TRUE,reported,zxSz2N
57,rs4736824,8,41879961,C,T,0.000200712,0.000175752,0.249999995,0.551344,462933,3292,459641,TRUE,reported,zxSz2N
58,rs4798766,18,9086213,G,A,-3.19E-05,0.000182984,0.860000097,0.642322,462933,3292,459641,TRUE,reported,zxSz2N
59,rs4904623,14,42067186,T,C,0.000256998,0.000208546,0.220000162,0.771534,462933,3292,459641,TRUE,reported,zxSz2N
60,rs5030956,6,27213969,G,C,0.000201519,0.00020214,0.320000016,0.248245,462933,3292,459641,TRUE,reported,zxSz2N
61,rs55994309,11,80265430,C,T,-0.000118125,0.00019478,0.540000299,0.283634,462933,3292,459641,TRUE,reported,zxSz2N
62,rs56871666,18,50226797,A,G,9.10E-05,0.000283699,0.749999545,0.107327,462933,3292,459641,TRUE,reported,zxSz2N
63,rs58457416,5,141084505,G,A,0.000430007,0.000254743,0.090999708,0.140221,462933,3292,459641,TRUE,reported,zxSz2N
64,rs58473710,1,191203760,T,C,0.000307118,0.000190426,0.11000008,0.306294,462933,3292,459641,TRUE,reported,zxSz2N
65,rs6087542,20,32512044,C,T,7.00E-05,0.000188957,0.70999943,0.688244,462933,3292,459641,TRUE,reported,zxSz2N
66,rs61836184,10,14455205,T,G,1.46E-05,0.000243481,0.949999988,0.162586,462933,3292,459641,TRUE,reported,zxSz2N
67,rs62031270,16,27996822,C,T,3.54E-05,0.000195644,0.860000097,0.285493,462933,3292,459641,TRUE,reported,zxSz2N
68,rs62188172,2,176506054,T,C,-0.000292027,0.000236537,0.220000162,0.163686,462933,3292,459641,TRUE,reported,zxSz2N
69,rs62466272,7,101227377,C,A,0.000134572,0.000236106,0.570000189,0.166577,462933,3292,459641,TRUE,reported,zxSz2N
70,rs627882,7,4205960,T,C,4.69E-05,0.000219389,0.830000015,0.197213,462933,3292,459641,TRUE,reported,zxSz2N
71,rs6452969,5,91064360,A,G,4.02E-05,0.00018244,0.830000015,0.359756,462933,3292,459641,TRUE,reported,zxSz2N
72,rs6489589,12,5100437,C,T,-0.000137042,0.000205011,0.499999995,0.759523,462933,3292,459641,TRUE,reported,zxSz2N
73,rs6851651,4,142402636,C,G,-8.73E-05,0.000190891,0.649999466,0.696811,462933,3292,459641,TRUE,reported,zxSz2N
74,rs7016314,8,14043662,T,C,-7.40E-05,0.000184519,0.689999856,0.655948,462933,3292,459641,TRUE,reported,zxSz2N
75,rs7045289,9,129913558,A,G,-0.000266573,0.000194194,0.170000031,0.283887,462933,3292,459641,TRUE,reported,zxSz2N
76,rs7186155,16,72178196,A,G,-4.55E-05,0.000175861,0.800000024,0.553543,462933,3292,459641,TRUE,reported,zxSz2N
77,rs7188873,16,24727064,A,G,0.000227258,0.000180391,0.209999857,0.622798,462933,3292,459641,TRUE,reported,zxSz2N
78,rs73801216,5,166853784,G,A,7.01E-05,0.000243268,0.770000487,0.169842,462933,3292,459641,TRUE,reported,zxSz2N
79,rs7424130,2,16249563,A,C,0.000373798,0.000201128,0.06299992,0.252242,462933,3292,459641,TRUE,reported,zxSz2N
80,rs7514305,1,210797443,G,T,5.29E-05,0.000182736,0.770000487,0.631049,462933,3292,459641,TRUE,reported,zxSz2N
81,rs752973,2,144633596,G,A,0.00021528,0.000192598,0.259999792,0.289889,462933,3292,459641,TRUE,reported,zxSz2N
82,rs792359,3,173010202,T,G,6.45E-05,0.000228746,0.780000714,0.177169,462933,3292,459641,TRUE,reported,zxSz2N
83,rs79769442,1,8658477,C,T,9.96E-05,0.000220871,0.649999466,0.194799,462933,3292,459641,TRUE,reported,zxSz2N
84,rs8111479,19,54478545,G,A,-0.000104677,0.000218513,0.630000654,0.799572,462933,3292,459641,TRUE,reported,zxSz2N
85,rs849054,6,6533706,T,C,-0.0001332,0.000178456,0.460000178,0.420999,462933,3292,459641,TRUE,reported,zxSz2N
86,rs853676,6,28299687,C,T,-0.000317024,0.000236133,0.180000205,0.163359,462933,3292,459641,TRUE,reported,zxSz2N
87,rs9398376,6,97712712,C,T,-0.000292386,0.000220809,0.190000175,0.194638,462933,3292,459641,TRUE,reported,zxSz2N
88,rs9828050,3,20040282,A,G,-0.000187361,0.000216905,0.390000353,0.203361,462933,3292,459641,TRUE,reported,zxSz2N

## Sheet: supplement 6.outcome
,"SNP","chr.outcome","pos.outcome","other_allele.outcome","effect_allele.outcome","beta.outcome","se.outcome","pval.outcome","eaf.outcome","samplesize.outcome","ncase.outcome","ncontrol.outcome","outcome","mr_keep.outcome","pval_origin.outcome","id.outcome"
1,"rs1001284","3",46933960,"C","G",-0.00112131,0.000488837,0.0219998641983517,0.579921,462933,26595,436338,"UKB-b-12064",TRUE,"reported","WLcXVB"
2,"rs10017096","4",111324679,"G","A",0.000597357,0.000513468,0.239999866425267,0.670992,462933,26595,436338,"UKB-b-12064",TRUE,"reported","WLcXVB"
3,"rs10865358","2",67046565,"T","G",0.000352671,0.000492083,0.470000153744122,0.577504,462933,26595,436338,"UKB-b-12064",TRUE,"reported","WLcXVB"
4,"rs10894898","11",134761316,"A","G",-0.000617279,0.000502151,0.220000161685546,0.401262,462933,26595,436338,"UKB-b-12064",TRUE,"reported","WLcXVB"
5,"rs112873699","19",2973846,"C","T",0.00042946,0.000549825,0.429999548925608,0.272859,462933,26595,436338,"UKB-b-12064",TRUE,"reported","WLcXVB"
6,"rs11763136","7",88725424,"A","G",-0.000257393,0.000484125,0.589999984183854,0.525342,462933,26595,436338,"UKB-b-12064",TRUE,"reported","WLcXVB"
7,"rs12415643","10",85674138,"C","T",0.000396015,0.000488356,0.419999719160426,0.432382,462933,26595,436338,"UKB-b-12064",TRUE,"reported","WLcXVB"
8,"rs12596299","16",81972283,"T","G",-0.000140327,0.000489857,0.770000487266739,0.572252,462933,26595,436338,"UKB-b-12064",TRUE,"reported","WLcXVB"
9,"rs13021985","2",162822709,"G","A",0.000643884,0.000486533,0.190000174579693,0.4478,462933,26595,436338,"UKB-b-12064",TRUE,"reported","WLcXVB"
10,"rs13242526","7",997334,"C","G",-9.00114e-05,0.000546286,0.870000094916712,0.270824,462933,26595,436338,"UKB-b-12064",TRUE,"reported","WLcXVB"
11,"rs1371530","2",188953133,"C","T",-0.000379267,0.000638126,0.550000393231399,0.178396,462933,26595,436338,"UKB-b-12064",TRUE,"reported","WLcXVB"
12,"rs1470438","1",102239205,"G","A",0.000824664,0.000498805,0.0980008855370931,0.387234,462933,26595,436338,"UKB-b-12064",TRUE,"reported","WLcXVB"
13,"rs1478364","5",152798385,"C","T",-0.000783726,0.00063283,0.220000161685546,0.182577,462933,26595,436338,"UKB-b-12064",TRUE,"reported","WLcXVB"
14,"rs152582","5",106793799,"T","C",-5.09137e-05,0.000574261,0.929999896026408,0.232024,462933,26595,436338,"UKB-b-12064",TRUE,"reported","WLcXVB"
15,"rs162869","3",78877109,"G","A",-0.000435279,0.000508067,0.39000035289358,0.351465,462933,26595,436338,"UKB-b-12064",TRUE,"reported","WLcXVB"
16,"rs17011693","2",125324765,"A","G",-3.17321e-05,0.000652923,0.959999926966642,0.164851,462933,26595,436338,"UKB-b-12064",TRUE,"reported","WLcXVB"
17,"rs17087144","9",86964718,"T","A",0.000193571,0.000533973,0.719999176986299,0.316464,462933,26595,436338,"UKB-b-12064",TRUE,"reported","WLcXVB"
18,"rs1874619","4",140579702,"G","C",0.000416933,0.000675556,0.540000298635231,0.150605,462933,26595,436338,"UKB-b-12064",TRUE,"reported","WLcXVB"
19,"rs1888097","14",34813050,"A","G",0.000773954,0.000688072,0.259999791679655,0.701834,462933,26595,436338,"UKB-b-12064",TRUE,"reported","WLcXVB"
20,"rs1987309","1",44898004,"G","A",-0.00046342,0.000629321,0.460000178281084,0.192143,462933,26595,436338,"UKB-b-12064",TRUE,"reported","WLcXVB"
21,"rs2071724","22",43577048,"C","A",-0.000259029,0.000491324,0.599999654082312,0.410016,462933,26595,436338,"UKB-b-12064",TRUE,"reported","WLcXVB"
22,"rs2455072","19",51766288,"G","T",-0.000659921,0.000487767,0.180000205117632,0.468961,462933,26595,436338,"UKB-b-12064",TRUE,"reported","WLcXVB"
23,"rs2465874","6",161298592,"G","T",0.000105385,0.00062336,0.870000094916712,0.184482,462933,26595,436338,"UKB-b-12064",TRUE,"reported","WLcXVB"
24,"rs2850460","18",71098470,"C","T",-6.2839e-05,0.000491797,0.899999980438636,0.415124,462933,26595,436338,"UKB-b-12064",TRUE,"reported","WLcXVB"
25,"rs28712877","12",109000787,"C","G",-0.000394584,0.000522771,0.450000503808422,0.311073,462933,26595,436338,"UKB-b-12064",TRUE,"reported","WLcXVB"
26,"rs3118032","1",58197487,"T","A",0.000129179,0.00060701,0.830000014570433,0.282422,462933,26595,436338,"UKB-b-12064",TRUE,"reported","WLcXVB"
27,"rs3132148","5",172700938,"A","G",0.000346054,0.000646254,0.589999984183854,0.173126,462933,26595,436338,"UKB-b-12064",TRUE,"reported","WLcXVB"
28,"rs3181295","12",6344174,"A","G",-0.000801359,0.00049172,0.1,0.595994,462933,26595,436338,"UKB-b-12064",TRUE,"reported","WLcXVB"
29,"rs35252693","14",104930719,"T","C",0.00011607,0.00074508,0.880000056431416,0.121008,462933,26595,436338,"UKB-b-12064",TRUE,"reported","WLcXVB"
30,"rs35420106","11",22373396,"A","G",-0.000288299,0.000773338,0.709999429901934,0.112605,462933,26595,436338,"UKB-b-12064",TRUE,"reported","WLcXVB"
31,"rs35502536","13",38066645,"A","G",0.00149935,0.000751896,0.0460002296665068,0.127767,462933,26595,436338,"UKB-b-12064",TRUE,"reported","WLcXVB"
32,"rs3932686","1",14721450,"G","A",-0.00074019,0.000524406,0.160000006389794,0.321782,462933,26595,436338,"UKB-b-12064",TRUE,"reported","WLcXVB"
33,"rs41383244","2",218680591,"A","G",0.000152503,0.000508075,0.760000713494546,0.346564,462933,26595,436338,"UKB-b-12064",TRUE,"reported","WLcXVB"
34,"rs4315124","12",72641836,"C","T",-0.000414787,0.000698973,0.550000393231399,0.859234,462933,26595,436338,"UKB-b-12064",TRUE,"reported","WLcXVB"
35,"rs4845473","1",152709456,"G","T",-0.000714358,0.000506501,0.160000006389794,0.352952,462933,26595,436338,"UKB-b-12064",TRUE,"reported","WLcXVB"
36,"rs487740","5",6518618,"C","T",0.000607197,0.000490488,0.220000161685546,0.427545,462933,26595,436338,"UKB-b-12064",TRUE,"reported","WLcXVB"
37,"rs4925661","1",247606739,"G","A",0.000107403,0.000496183,0.830000014570433,0.422455,462933,26595,436338,"UKB-b-12064",TRUE,"reported","WLcXVB"
38,"rs4961289","8",141748265,"G","T",-0.000761167,0.00048599,0.119999932014548,0.44647,462933,26595,436338,"UKB-b-12064",TRUE,"reported","WLcXVB"
39,"rs55996111","11",116254118,"G","A",0.000184357,0.000599225,0.760000713494546,0.231993,462933,26595,436338,"UKB-b-12064",TRUE,"reported","WLcXVB"
40,"rs6015307","20",57142573,"T","C",0.000539206,0.000605192,0.370000235082988,0.200263,462933,26595,436338,"UKB-b-12064",TRUE,"reported","WLcXVB"
41,"rs62254574","3",55176673,"T","C",-0.000277737,0.00069394,0.689999855838142,0.141491,462933,26595,436338,"UKB-b-12064",TRUE,"reported","WLcXVB"
42,"rs62307864","4",39798698,"C","A",0.000278992,0.000512723,0.589999984183854,0.349059,462933,26595,436338,"UKB-b-12064",TRUE,"reported","WLcXVB"
43,"rs662705","7",123431594,"A","C",7.17613e-05,0.000495682,0.880000056431416,0.39007,462933,26595,436338,"UKB-b-12064",TRUE,"reported","WLcXVB"
44,"rs6723737","2",33120410,"A","T",-0.00181628,0.000497094,0.000259997995670924,0.572504,462933,26595,436338,"UKB-b-12064",TRUE,"reported","WLcXVB"
45,"rs67573460","3",30704855,"G","A",-6.82665e-05,0.000698324,0.919999942071771,0.143624,462933,26595,436338,"UKB-b-12064",TRUE,"reported","WLcXVB"
46,"rs6814202","4",73781518,"C","A",0.000217669,0.000522902,0.680000136680911,0.691232,462933,26595,436338,"UKB-b-12064",TRUE,"reported","WLcXVB"
47,"rs6861401","5",67572893,"G","A",-0.000721187,0.000494543,0.139999988498695,0.393997,462933,26595,436338,"UKB-b-12064",TRUE,"reported","WLcXVB"
48,"rs6971575","7",96039648,"C","G",-0.000183527,0.00053339,0.730000235121762,0.696688,462933,26595,436338,"UKB-b-12064",TRUE,"reported","WLcXVB"
49,"rs7084091","10",8507331,"T","C",0.00104242,0.000594109,0.0790005291083221,0.78993,462933,26595,436338,"UKB-b-12064",TRUE,"reported","WLcXVB"
50,"rs7172916","15",50380740,"G","A",-0.000238463,0.000594899,0.689999855838142,0.208882,462933,26595,436338,"UKB-b-12064",TRUE,"reported","WLcXVB"
51,"rs73275098","7",2387095,"G","A",-0.000658143,0.000494275,0.180000205117632,0.424853,462933,26595,436338,"UKB-b-12064",TRUE,"reported","WLcXVB"
52,"rs74628826","8",127184851,"G","T",0.000647049,0.000752187,0.39000035289358,0.120377,462933,26595,436338,"UKB-b-12064",TRUE,"reported","WLcXVB"
53,"rs7560364","2",69648829,"G","A",-0.00025342,0.000627423,0.689999855838142,0.180835,462933,26595,436338,"UKB-b-12064",TRUE,"reported","WLcXVB"
54,"rs75640836","7",76028163,"C","T",0.000833151,0.000587415,0.160000006389794,0.214971,462933,26595,436338,"UKB-b-12064",TRUE,"reported","WLcXVB"
55,"rs774397","12",67410013,"C","T",0.000396447,0.00048468,0.410000135265173,0.49776,462933,26595,436338,"UKB-b-12064",TRUE,"reported","WLcXVB"
56,"rs7750405","6",63487557,"A","T",-0.000240515,0.000730457,0.740000477554179,0.125147,462933,26595,436338,"UKB-b-12064",TRUE,"reported","WLcXVB"
57,"rs7968433","12",130234919,"C","T",-0.000664785,0.000484862,0.170000030775649,0.53712,462933,26595,436338,"UKB-b-12064",TRUE,"reported","WLcXVB"
58,"rs9455911","6",168248210,"C","G",-0.000516775,0.000506125,0.310000218541595,0.363057,462933,26595,436338,"UKB-b-12064",TRUE,"reported","WLcXVB"
59,"rs9995232","4",38925137,"T","C",-0.000528321,0.00048991,0.279999979792925,0.419752,462933,26595,436338,"UKB-b-12064",TRUE,"reported","WLcXVB"
